# Supplementary material for: NHC-catalyzed activation of α,β-unsaturated N-acyltriazoles: an easy access to dihydropyranones
Source: Royal Society of Chemistry journal article supplement (doi:10.1039/c5cc06044c), 2015-01-01
Supplement: c5cc06044c1.pdf [file c5cc06044c1.pdf]

## Content

|                                                                               |    |
|-------------------------------------------------------------------------------|----|
| 1. General Methods.....                                                       | 2  |
| 2. Materials.....                                                             | 2  |
| 3. General procedure.....                                                     | 2  |
| 4. Characterization Data .....                                                | 3  |
| 5. References .....                                                           | 9  |
| 6. Copies of NMR spectra and HPLC measurements of the products <b>3</b> ..... | 10 |

## 1. General Methods

The products were purified by column chromatography on Merck silica gel 60, particle size 0.040-0.063 mm (230-240 mesh, flash). For thin-layer chromatography (TLC) analysis, SIL G-25 UV254 from MACHEREY&NAGEL were used. Visualization of the developed TLC plates was performed with ultraviolet irradiation (254 nm).  $^1\text{H}$ - and  $^{13}\text{C}$ -NMR spectra were recorded at ambient temperature on Inova 400 or VNMRS 600 instruments with tetramethylsilane as an internal standard. Mass spectra and high resolution mass spectra were acquired on a Finnigan MAT 95 (EI/CI) or on a ThermoFisher Scientific LTQ Orbitrap XL (ESI). IR spectra were taken on a PerkinElmer Spectrum 100 FT-IR Spectrometer. Microanalyses were performed with a Vario EL element analyser. Optical rotation values were measured on a Perkin-Elmer 241 polarimeter. Analytical HPLC was performed on a Hewlett-Packard 1100 Series instrument using chiral stationary phases [Daicel AD, Daicel AS, Daicel OD, Daicel OJ, Daicel (s,s)-Whelk O1 or Daicel Whelk.M].

## 2. Materials

All reactions were carried out under argon. Toluene and mesitylene were distilled over Solvona<sup>®</sup>. Dry dichloromethane was purchased from Acros. All other chemicals were used without further purification. Triazolium salts **A-G** were prepared according to known literature procedures.<sup>[1]</sup> The corresponding  $\alpha,\beta$ -unsaturated N-acyltriazoles **2** were prepared according to the literature.<sup>[2]</sup> Racemic samples were prepared with precatalyst **A**.

## 3. General procedure

To a dried and argon-filled Schlenk flask was added 1,3-dicarbonyl compound **1** (0.5 mmol, 1.0 equiv.),  $\alpha,\beta$ -unsaturated N-acyltriazole **2** (1.0 mmol, 2.0 equiv.), triazolium salt **D** (0.1 mmol, 20 mol%) and 3 Å MS (100 mg) in toluene (5 mL). The mixture was cooled down to  $-5\text{ }^{\circ}\text{C}$  and then  $\text{K}_2\text{CO}_3$  (0.2 mmol, 40 mol%) was added. After stirring for 48 h at  $-5\text{ }^{\circ}\text{C}$ , the solution was directly purified by flash chromatography on silica gel (*n*-pentane/Et<sub>2</sub>O 4:1 or DCM) to afford the products **3a-o**.

#### 4. Characterization Data

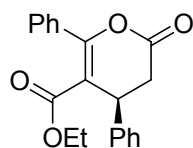

The compound **3a** was prepared according to the general procedure. The product was obtained as colorless oil (105.6 mg, 66% yield). The ee (86%) was measured by HPLC using a chiral stationary phase [Daicel AS, *n*-heptane:EtOH = 9:1, 1.0 mL/min),  $t_R$  = 11.13 min (major), 9.27 min (minor)],  $[\alpha]_D^{21}$  = +70.7 ( $c$  = 1.0, CHCl<sub>3</sub>).

<sup>1</sup>H NMR (600 MHz, CDCl<sub>3</sub>)  $\delta$  7.53 - 7.51 (m, 2H), 7.47 - 7.40 (m, 3H), 7.35 - 7.33 (m, 2H), 7.29 - 7.26 (m, 3H), 4.41 (dd,  $J$  = 7.7, 2.5 Hz, 1H), 3.98 - 3.89 (m, 2H), 3.11 (dd,  $J$  = 15.9, 7.7 Hz, 1H), 2.94 (dd,  $J$  = 15.9, 2.5 Hz, 1H), 0.88 (t,  $J$  = 7.1 Hz, 3H) ppm; <sup>13</sup>C NMR (151 MHz, CDCl<sub>3</sub>)  $\delta$  166.35, 166.00, 158.52, 139.89, 133.08, 130.13, 129.19 (2C), 128.63 (2C), 127.99 (2C), 127.74, 126.74 (2C), 111.69, 61.00, 38.84, 36.31, 13.45 ppm.

MS (EI, 70 eV)  $m/z$  (%): 322 [M<sup>+</sup>] (60), 294 (18), 279 (20), 248 (45), 220 (23), 105 (100), 77 (35).

IR (ATR): 2984, 2324, 2097, 1891, 1778, 1704, 1448, 1300, 1238, 1067, 846, 755, 698 cm<sup>-1</sup>.

HRMS (EI): calcd for C<sub>20</sub>H<sub>18</sub>O<sub>4</sub> [M<sup>+</sup>]: 322.1200; found: 322.1203.

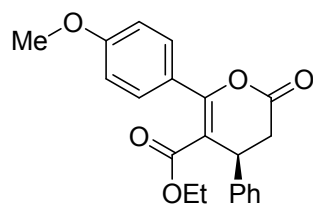

The compound **3b** was prepared according to the general procedure. The product was obtained as colorless oil (125.0 mg, 71% yield). The ee (82%) was measured by HPLC using a chiral stationary phase [Daicel AD, *n*-heptane:*i*-PrOH = 9:1, 1.0 mL/min),  $t_R$  = 13.48 min (major), 10.58 min (minor)],  $[\alpha]_D^{21}$  = +46.0 ( $c$  = 1.0, CHCl<sub>3</sub>).

<sup>1</sup>H NMR (600 MHz, CDCl<sub>3</sub>)  $\delta$  7.51 - 7.45 (m, 2H), 7.33 (t,  $J$  = 7.4 Hz, 2H), 7.29 - 7.22 (m, 3H), 6.95 - 6.89 (m, 2H), 4.39 (dd,  $J$  = 7.7, 2.5 Hz, 1H), 4.02 - 3.93 (m, 2H), 3.85 (s, 3H), 3.08 (dd,  $J$  = 15.8, 7.6 Hz, 1H), 2.92 (dd,  $J$  = 15.9, 2.5 Hz, 1H), 0.95 (t,  $J$  = 7.1 Hz, 3H) ppm; <sup>13</sup>C NMR (151 MHz, CDCl<sub>3</sub>)  $\delta$  166.63, 166.24, 161.12, 158.29, 140.05, 130.34 (2C), 129.14 (2C), 127.66, 126.74 (2C), 125.15, 113.32 (2C), 110.60, 60.96, 55.37, 38.97, 36.39, 13.65 ppm.

MS (EI, 70 eV)  $m/z$  (%): 352 [M<sup>+</sup>] (72), 278 (14), 135 (100), 77 (22).

IR (ATR): 2969, 2315, 2095, 1901, 1775, 1703, 1610, 1507, 1242, 1059, 840, 767, 702, 541 cm<sup>-1</sup>.

HRMS (ESI): calcd for C<sub>21</sub>H<sub>20</sub>O<sub>5</sub> [M+Na]<sup>+</sup>: 375.1203; found: 375.1201.

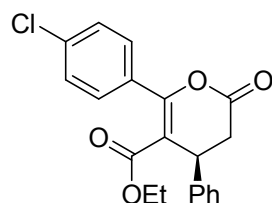

The compound **3c** was prepared according to the general procedure. The product was obtained as light yellow oil (168.1 mg, 94% yield). The ee (76%) was measured by HPLC using a chiral

stationary phase [Daicel AD, *n*-heptane:*i*-PrOH = 9:1, 1.0 mL/min),  $t_R$  = 9.43 min (major), 7.73 min (minor)],  $[\alpha]_D^{21}$  = +63.0 ( $c$  = 1.0, CHCl<sub>3</sub>).

<sup>1</sup>H NMR (600 MHz, CDCl<sub>3</sub>)  $\delta$  7.48 - 7.44 (m, 2H), 7.41 - 7.38 (m, 2H), 7.34 (t,  $J$  = 7.4 Hz, 2H), 7.30 - 7.26 (m, 1H), 7.23 (d,  $J$  = 7.4 Hz, 2H), 4.40 (dd,  $J$  = 7.7, 2.5 Hz, 1H), 4.00 - 3.91 (m, 2H), 3.09 (dd,  $J$  = 15.9, 7.7 Hz, 1H), 2.94 (dd,  $J$  = 16.0, 2.5 Hz, 1H), 0.93 (t,  $J$  = 7.1 Hz, 3H) ppm; <sup>13</sup>C NMR (151 MHz, CDCl<sub>3</sub>)  $\delta$  165.96, 165.70, 157.38, 139.69, 136.25, 131.43, 130.08 (2C), 129.23 (2C), 128.27 (2C), 127.82, 126.68 (2C), 112.10, 61.16, 38.85, 36.19, 13.55 ppm.

MS (EI, 70 eV)  $m/z$  (%): 356 [M<sup>+</sup>] (74), 313 (27), 282 (40), 254 (24), 139 (100), 111 (31).

IR (ATR): 2982, 2320, 2092, 1910, 1781, 1706, 1486, 1299, 1241, 1070, 991, 845, 753, 698 cm<sup>-1</sup>.

HRMS (EI): calcd for C<sub>20</sub>H<sub>17</sub>ClO<sub>4</sub> [M]<sup>+</sup>: 356.0810; found: 356.0812.

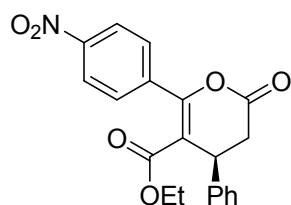

The compound **3d** was prepared according to the general procedure. The product was obtained as yellow oil (176.2 mg, 96% yield). The ee (62%) was measured by HPLC using a chiral stationary phase [Daicel (s,s)-Whelk O1, *n*-heptane:EtOH = 7:3, 0.5 mL/min),  $t_R$  = 17.08 min (major), 14.00 min (minor)],  $[\alpha]_D^{21}$  = +70.8 ( $c$  = 1.0, CHCl<sub>3</sub>).

<sup>1</sup>H NMR (600 MHz, CDCl<sub>3</sub>)  $\delta$  8.28 - 8.25 (m, 2H), 7.71 - 7.67 (m, 2H), 7.37 - 7.33 (m, 2H), 7.31 - 7.27 (m, 1H), 7.26 - 7.22 (m, 2H), 4.44 (dd,  $J$  = 7.7, 2.6 Hz, 1H), 3.96 (q,  $J$  = 7.1 Hz, 2H), 3.14 (dd,  $J$  = 16.0, 7.7 Hz, 1H), 2.98 (dd,  $J$  = 16.0, 2.6 Hz, 1H), 0.92 (t,  $J$  = 7.1 Hz, 3H) ppm; <sup>13</sup>C NMR (151 MHz, CDCl<sub>3</sub>)  $\delta$  165.22, 165.07, 156.27, 148.51, 139.37, 139.20, 129.89 (2C), 129.33 (2C), 127.99, 126.63 (2C), 123.21 (2C), 113.61, 61.40, 38.82, 36.00, 13.55 ppm.

MS (EI, 70 eV)  $m/z$  (%): 367 [M<sup>+</sup>] (55), 324 (42), 293 (51), 265 (30), 150 (90), 104 (100), 92 (46), 76 (84).

IR (ATR): 2986, 2321, 2095, 1923, 1784, 1708, 1600, 1518, 1342, 1244, 1074, 989, 856, 749, 698 cm<sup>-1</sup>.

HRMS (EI): calcd for C<sub>20</sub>H<sub>17</sub>NO<sub>6</sub> [M]<sup>+</sup>: 367.1050; found: 367.1051.

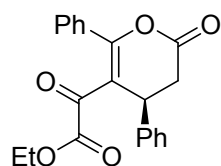

The compound **3e** was prepared according to the general procedure. The product was obtained as light yellow oil (153.3 mg, 77% yield). The ee (79%) was measured by HPLC using a chiral stationary phase [Daicel AD, *n*-heptane:*i*-PrOH = 7:3, 0.7 mL/min),  $t_R$  = 14.19 min (major), 9.95 min (minor)],  $[\alpha]_D^{21}$  = +81.0 ( $c$  = 1.0, CHCl<sub>3</sub>).

<sup>1</sup>H NMR (600 MHz, CDCl<sub>3</sub>)  $\delta$  7.67 - 7.65 (m, 2H), 7.51 - 7.47 (m, 1H), 7.36 - 7.32 (m, 2H), 7.28 - 7.21 (m, 3H), 7.15 - 7.11 (m, 2H), 4.17 (dd,  $J$  = 7.7, 3.1 Hz, 1H), 4.09 - 4.02 (m, 1H), 4.01 - 3.95 (m, 1H), 3.17 (dd,  $J$  = 16.2, 7.7 Hz, 1H), 3.03 (dd,  $J$  = 16.2, 3.1 Hz, 1H), 1.01 (t,  $J$  = 7.1 Hz, 3H) ppm; <sup>13</sup>C NMR (151 MHz, CDCl<sub>3</sub>)  $\delta$  192.97, 164.91, 159.66, 140.29, 137.38, 136.11, 133.55, 129.33 (2C), 128.67 (2C), 128.60 (2C), 128.35, 128.18, 127.10 (2C), 62.48, 41.18, 35.15, 13.49

ppm.

MS (EI, 70 eV)  $m/z$  (%): 350 [ $M^+$ ] (20), 277 (51), 235 (40), 105 (100), 77 (51).

IR (ATR): 2923, 2661, 2324, 2167, 2089, 1984, 1910, 1783, 1733, 1664, 1594, 1495, 1450, 1371, 1307, 1275, 1163, 1126, 1014, 957, 913, 856, 762, 698  $\text{cm}^{-1}$ .

HRMS (ESI): calcd for  $\text{C}_{21}\text{H}_{18}\text{O}_5$  [ $M+\text{Na}$ ] $^+$ : 373.1046; found: 373.1041.

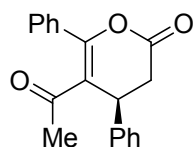

The compound **3f** was prepared according to the general procedure. The product was obtained as colorless oil (109.5 mg, 75% yield). The ee (81%) was measured by HPLC using a chiral stationary phase [Daicel OJ, *n*-heptane:EtOH = 8:2, 1.0 mL/min),  $t_R$  = 23.61 min (major), 17.37 min (minor)],  $[\alpha]_D^{21}$  = +62.0 ( $c$  = 1.0,  $\text{CHCl}_3$ ).

$^1\text{H}$  NMR (600 MHz,  $\text{CDCl}_3$ )  $\delta$  7.64 - 7.61 (m, 2H), 7.53 - 7.50 (m, 1H), 7.41 - 7.37 (m, 2H), 7.28 - 7.24 (m, 2H), 7.23 - 7.18 (m, 1H), 7.16 - 7.12 (m, 2H), 4.32 (dd,  $J$  = 7.3, 2.9 Hz, 1H), 3.06 (dd,  $J$  = 16.0, 7.6 Hz, 1H), 2.93 (dd,  $J$  = 16.0, 3.6 Hz, 1H), 1.90 (d,  $J$  = 1.1 Hz, 3H) ppm;  $^{13}\text{C}$  NMR (151 MHz,  $\text{CDCl}_3$ )  $\delta$  195.77, 166.49, 154.73, 139.95, 138.40, 133.06, 129.13 (2C), 128.78 (2C), 128.71 (2C), 127.62, 126.75 (2C), 117.74, 39.41, 36.19, 19.01 ppm.

MS (EI, 70 eV)  $m/z$  (%): 293 [ $M^+$ ] (60), 274 (19), 264 (56), 249 (18), 221 (30), 207 (21), 173 (51), 105 (100), 77 (48).

IR (ATR): 3028, 2099, 1777, 1641, 1598, 1493, 1446, 1384, 1315, 1224, 1175, 1116, 1032, 986, 899, 856, 805, 755, 698  $\text{cm}^{-1}$ .

HRMS (EI): calcd for  $\text{C}_{19}\text{H}_{16}\text{O}_3$  [ $M$ ] $^+$ : 292.1094; found: 292.1103.

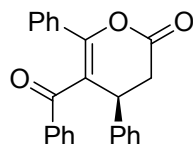

The compound **3g** was prepared according to the general procedure. The product was obtained as a colorless solid (95.0 mg, 65% yield). The ee (82%) was measured by HPLC using a chiral stationary phase [Daicel Whelk.M, *n*-heptane:EtOH = 7:3, 0.7 mL/min),  $t_R$  = 14.19 min (major), 8.34 min (minor)],  $[\alpha]_D^{21}$  = +14.8 ( $c$  = 1.0,  $\text{CHCl}_3$ ). Melting point: 120 - 123  $^{\circ}\text{C}$ .

$^1\text{H}$  NMR (600 MHz,  $\text{CDCl}_3$ )  $\delta$  7.52 - 7.47 (m, 2H), 7.39 - 7.35 (m, 2H), 7.32 - 7.25 (m, 4H), 7.25 - 7.19 (m, 2H), 7.19 - 7.14 (m, 1H), 7.14 - 7.05 (m, 4H), 4.56 (dd,  $J$  = 7.9, 2.4 Hz, 1H), 3.21 (dd,  $J$  = 15.9, 7.9 Hz, 1H), 3.06 (dd,  $J$  = 15.9, 2.4 Hz, 1H) ppm;  $^{13}\text{C}$  NMR (151 MHz,  $\text{CDCl}_3$ )  $\delta$  195.90, 166.67, 154.81, 139.70, 137.07, 132.59, 131.96, 130.29, 129.24 (2C), 129.22 (2C), 128.98 (2C), 128.05 (2C), 127.99 (2C), 127.78, 126.84 (2C), 118.27, 40.38, 35.95 ppm.

MS (EI, 70 eV)  $m/z$  (%): 354 [ $M^+$ ] (9), 105 (100), 77 (92).

IR (ATR): 3061, 3030, 2105, 1778, 1640, 1493, 1448, 1411, 1323, 1249, 1187, 1113, 1025, 987, 900, 843, 757, 730, 696  $\text{cm}^{-1}$ .

HRMS (EI): calcd for  $\text{C}_{24}\text{H}_{18}\text{O}_3$  [ $M$ ] $^+$ : 354.1251; found: 354.1251.

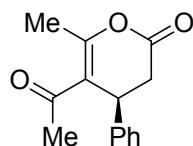

The compound **3h** was prepared according to the general procedure. The product was obtained as a colorless solid (78.5 mg, 68% yield). The ee (80%) was measured by HPLC using a chiral stationary phase [Daicel (s,s)-Whelk O1, *n*-heptane:EtOH = 9:1, 1.0 mL/min),  $t_R$  = 11.63 min (major), 9.93 min (minor)],  $[\alpha]_D^{21}$  = +36.6 ( $c$  = 1.0, CHCl<sub>3</sub>). Melting point: 68 - 69 °C.

<sup>1</sup>H NMR (600 MHz, CDCl<sub>3</sub>)  $\delta$  7.34 - 7.30 (m, 2H), 7.28 - 7.24 (m, 1H), 7.15 - 7.11 (m, 2H), 4.17 - 4.11 (m, 1H), 2.95 (dd,  $J$  = 15.7, 7.3 Hz, 1H), 2.82 (dd,  $J$  = 15.7, 2.6 Hz, 1H), 2.41 (d,  $J$  = 1.1 Hz, 3H), 2.11 (s, 3H) ppm; <sup>13</sup>C NMR (151 MHz, CDCl<sub>3</sub>)  $\delta$  197.88, 165.59, 160.24, 139.69, 129.42 (2C), 127.92, 126.64 (2C), 117.26, 38.83, 37.16, 29.76, 19.07 ppm.

MS (EI, 70 eV)  $m/z$  (%): 230 [M<sup>+</sup>] (35), 212 (42), 202 (48), 187 (76), 145 (57), 131 (100), 115 (55), 103 (58), 91 (31), 77 (70), 51 (59).

IR (ATR): 2920, 2089, 1781, 1688, 1609, 1492, 1450, 1423, 1359, 1291, 1268, 1242, 1172, 1114, 1025, 943, 863, 770, 702, 660 cm<sup>-1</sup>.

Anal. calcd. for C<sub>14</sub>H<sub>14</sub>O<sub>3</sub> (230) C, 73.03; H, 6.13; found: C, 72.93; H, 6.04.

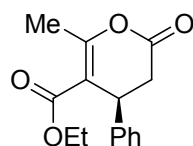

The compound **3i** was prepared according to the general procedure. The product was obtained as a colorless solid (105.3 mg, 81% yield). The ee (85%) was measured by HPLC using a chiral stationary phase [Daicel (s,s)-Whelk O1, *n*-heptane:EtOH = 7:3, 0.7 mL/min),  $t_R$  = 6.80 min (major), 5.79 min (minor)],  $[\alpha]_D^{21}$  = +202.0 ( $c$  = 1.0, CHCl<sub>3</sub>).

<sup>1</sup>H NMR (600 MHz, CDCl<sub>3</sub>)  $\delta$  7.31 - 7.28 (m, 2H), 7.25 - 7.22 (m, 1H), 7.15 - 7.12 (m, 2H), 4.27 - 4.24 (m, 1H), 4.15 - 4.12 (m, 2H), 2.95 (dd,  $J$  = 15.9, 7.6 Hz, 1H), 2.83 (dd,  $J$  = 15.9, 2.2 Hz, 1H), 2.47 (d,  $J$  = 1.0 Hz, 3H), 1.19 (t,  $J$  = 7.1 Hz, 3H) ppm; <sup>13</sup>C NMR (151 MHz, CDCl<sub>3</sub>)  $\delta$  166.13, 165.93, 161.31, 140.60, 129.01 (2C), 127.48, 126.58 (2C), 109.99, 60.85, 37.82, 36.36, 18.88, 14.05 ppm.

MS (EI, 70 eV)  $m/z$  (%): 260 [M<sup>+</sup>] (40), 217 (32), 186 (48), 171 (23), 158 (90), 144 (24), 131 (75), 115 (93), 103 (85), 91 (47), 77 (100).

IR (ATR): 2987, 2280, 2213, 2126, 2084, 2017, 1775, 1710, 1644, 1494, 1452, 1369, 1281, 1242, 1175, 1122, 1066, 972, 864, 764, 705, 668 cm<sup>-1</sup>.

HRMS (EI): calcd for C<sub>15</sub>H<sub>16</sub>O<sub>4</sub> [M]<sup>+</sup>: 260.1046; found: 260.1043.

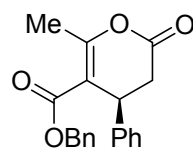

The compound **3j** was prepared according to the general procedure. The product was obtained as a colorless solid (100.0 mg, 62% yield). The ee (83%) was measured by HPLC using a chiral stationary phase [Daicel (s,s)-Whelk O1, *n*-heptane:EtOH = 7:3, 0.7 mL/min),  $t_R$  = 7.80 min

(major), 6.58 min (minor)],  $[\alpha]_{\text{D}}^{21} = +55.8$  ( $c = 1.0$ ,  $\text{CHCl}_3$ ). Melting point: 92 - 95 °C.

$^1\text{H}$  NMR (400 MHz,  $\text{CDCl}_3$ )  $\delta$  7.32 - 7.20 (m, 6H), 7.15 - 7.02 (m, 4H), 5.14 - 5.04 (m, 2H), 4.26 (d,  $J = 7.3$  Hz, 1H), 2.93 (dd,  $J = 15.8, 7.6$  Hz, 1H), 2.80 (dd,  $J = 15.8, 2.2$  Hz, 1H), 2.47 (d,  $J = 1.1$  Hz, 3H) ppm;  $^{13}\text{C}$  NMR (100 MHz,  $\text{CDCl}_3$ )  $\delta$  165.89, 165.66, 162.02, 140.50, 135.55, 129.05 (2C), 128.45 (2C), 128.13, 127.85 (2C), 127.53, 126.62 (2C), 109.58, 66.54, 37.87, 36.36, 18.93 ppm.

MS (EI, 70 eV)  $m/z$  (%): 322 [ $\text{M}^+$ ] (1), 231 (19), 91 (100).

IR (ATR): 3063, 3028, 2320, 2204, 2083, 2010, 1901, 1778, 1710, 1638, 1492, 1449, 1379, 1285, 1228, 1177, 1114, 1065, 864, 798, 701  $\text{cm}^{-1}$ .

Anal. calcd. for  $\text{C}_{20}\text{H}_{18}\text{O}_4$  (322) C, 74.52; H, 5.63; found: C, 74.39; H, 5.65.

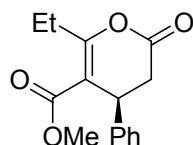

The compound **3k** was prepared according to the general procedure. The product was obtained as colorless oil (114.4 mg, 88% yield). The ee (83%) was measured by HPLC using a chiral stationary phase [Daicel (s,s)-Whelk O1, *n*-heptane:EtOH = 9:1, 1.0 mL/min),  $t_{\text{R}} = 6.78$  min (major), 5.68 min (minor)],  $[\alpha]_{\text{D}}^{21} = +152.0$  ( $c = 1.0$ ,  $\text{CHCl}_3$ ).

$^1\text{H}$  NMR (600 MHz,  $\text{CDCl}_3$ )  $\delta$  7.33 - 7.27 (m, 2H), 7.26 - 7.21 (m, 1H), 7.14 - 7.09 (m, 2H), 4.25 (dd,  $J = 7.7, 2.1$  Hz, 1H), 3.67 (d,  $J = 1.3$  Hz, 3H), 2.96 - 2.87 (m, 2H), 2.87 - 2.78 (m, 2H), 1.27 (td,  $J = 7.5, 0.8$  Hz, 3H) ppm;  $^{13}\text{C}$  NMR (151 MHz,  $\text{CDCl}_3$ )  $\delta$  166.36, 166.23, 166.19, 140.34, 129.07 (2C), 127.52, 126.51 (2C), 108.94, 51.91, 37.70, 36.52, 25.47, 11.78 ppm.

MS (EI, 70 eV)  $m/z$  (%): 260 [ $\text{M}^+$ ] (66), 228 (53), 217 (19), 203 (40), 200 (73), 189 (100), 172 (29), 157 (20), 131 (23), 121 (70), 115 (29), 57 (24).

IR (ATR): 3025, 2109, 1782, 1711, 1643, 1436, 1352, 1282, 1215, 1171, 1114, 1052, 975, 941, 866, 751, 701, 666  $\text{cm}^{-1}$ .

HRMS (EI): calcd for  $\text{C}_{15}\text{H}_{16}\text{O}_4$  [ $\text{M}^+$ ]: 260.1043; found: 260.1050.

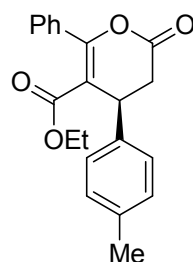

The compound **3l** was prepared according to the general procedure. The product was obtained as a white solid (109.2 mg, 65% yield). The ee (77%) was measured by HPLC using a chiral stationary phase [Daicel OD, *n*-heptane:*i*-PrOH = 9:1, 0.7 mL/min),  $t_{\text{R}} = 11.10$  min (major), 12.78 min (minor)],  $[\alpha]_{\text{D}}^{21} = +65.4$  ( $c = 1.0$ ,  $\text{CHCl}_3$ ). Melting point: 92 - 94 °C.

$^1\text{H}$  NMR (600 MHz,  $\text{CDCl}_3$ )  $\delta$  7.54 - 7.49 (m, 2H), 7.47 - 7.38 (m, 3H), 7.14 (s, 4H), 4.37 (dd,  $J = 7.7, 2.4$  Hz, 1H), 3.98 - 3.89 (m, 2H), 3.08 (dd,  $J = 15.8, 7.7$  Hz, 1H), 2.92 (dd,  $J = 15.8, 2.4$  Hz, 1H), 2.32 (s, 3H), 0.89 (t,  $J = 7.1$  Hz, 3H) ppm;  $^{13}\text{C}$  NMR (151 MHz,  $\text{CDCl}_3$ )  $\delta$  166.40, 166.10, 158.31, 137.40, 136.84, 133.14, 130.06, 129.84 (2C), 128.62 (2C), 127.95 (2C), 126.60 (2C),

111.91, 60.96, 38.48, 36.41, 21.04, 13.45 ppm.

MS (EI, 70 eV)  $m/z$  (%): 336 [ $M^+$ ] (46), 279 (18), 262 (32), 234 (20), 105 (100), 77 (59).

IR (ATR): 3921, 3784, 3472, 2983, 2654, 2319, 2079, 1993, 1912, 1784, 1708, 1645, 1512, 1449, 1368, 1303, 1233, 1187, 1112, 1069, 988, 853, 769, 698  $\text{cm}^{-1}$ .

Anal. calcd. for  $\text{C}_{21}\text{H}_{20}\text{O}_4$  (336) C, 74.98; H, 5.99; found: C, 74.82; H, 6.03.

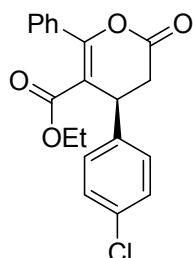

The compound **3m** was prepared according to the general procedure. The product was obtained as a colorless solid (119.5 mg, 67% yield). The ee (79%) was measured by HPLC using a chiral stationary phase [Daicel AD, *n*-heptane:*i*-PrOH = 9:1, 1.0 mL/min),  $t_R$  = 11.94 min (major), 8.66 min (minor)],  $[\alpha]_D^{21}$  = +55.0 ( $c$  = 1.0,  $\text{CHCl}_3$ ). Melting point: 69 - 71  $^\circ\text{C}$ .

$^1\text{H}$  NMR (600 MHz,  $\text{CDCl}_3$ )  $\delta$  7.52 - 7.48 (m, 2H), 7.48 - 7.44 (m, 1H), 7.44 - 7.39 (m, 2H), 7.31 (d,  $J$  = 8.4 Hz, 2H), 7.19 (d,  $J$  = 8.5 Hz, 2H), 4.38 (dd,  $J$  = 7.8, 2.3 Hz, 1H), 4.00 - 3.89 (m, 2H), 3.10 (dd,  $J$  = 15.9, 7.7 Hz, 1H), 2.91 (dd,  $J$  = 15.9, 2.3 Hz, 1H), 0.88 (t,  $J$  = 7.1 Hz, 3H) ppm;  $^{13}\text{C}$  NMR (151 MHz,  $\text{CDCl}_3$ )  $\delta$  166.20, 165.64, 158.87, 138.41, 133.63, 132.86, 130.27, 129.38 (2C), 128.61 (2C), 128.15 (2C), 128.01 (2C), 111.23, 61.11, 38.29, 36.14, 13.45 ppm.

MS (EI, 70 eV)  $m/z$  (%): 356 [ $M^+$ ] (29), 282 (28), 105 (100), 77 (51).

IR (ATR): 3386, 2982, 2660, 2324, 2112, 1908, 1781, 1702, 1644, 1490, 1445, 1409, 1371, 1341, 1303, 1238, 1183, 1109, 1066, 989, 849, 765, 729, 696  $\text{cm}^{-1}$ .

HRMS (EI): calcd for  $\text{C}_{20}\text{H}_{17}\text{ClO}_4$  [ $M$ ] $^+$ : 356.0810; found: 356.0813.

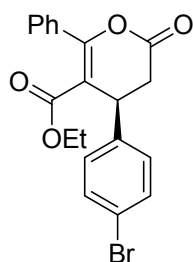

The compound **3n** was prepared according to the general procedure. The product was obtained as a colorless solid (150.2 mg, 78% yield). The ee (76%) was measured by HPLC using a chiral stationary phase [Daicel AD, *n*-heptane:*i*-PrOH = 9:1, 1.0 mL/min),  $t_R$  = 12.83 min (major), 9.23 min (minor)],  $[\alpha]_D^{21}$  = +47.5 ( $c$  = 1.0,  $\text{CHCl}_3$ ). Melting point: 91 - 93  $^\circ\text{C}$ .

$^1\text{H}$  NMR (600 MHz,  $\text{CDCl}_3$ )  $\delta$  7.52 - 7.48 (m, 2H), 7.48 - 7.43 (m, 3H), 7.43 - 7.38 (m, 2H), 7.16 - 7.11 (m, 2H), 4.37 (dd,  $J$  = 7.7, 2.4 Hz, 1H), 3.99 - 3.89 (m, 2H), 3.10 (dd,  $J$  = 15.9, 7.8 Hz, 1H), 2.90 (dd,  $J$  = 15.9, 2.4 Hz, 1H), 0.88 (t,  $J$  = 7.1 Hz, 3H) ppm;  $^{13}\text{C}$  NMR (151 MHz,  $\text{CDCl}_3$ )  $\delta$  166.16, 165.59, 158.90, 138.98, 132.88, 132.32 (2C), 130.27, 128.61 (2C), 128.51 (2C), 128.01 (2C), 121.71, 111.16, 61.10, 38.36, 36.05, 13.45 ppm.

MS (EI, 70 eV)  $m/z$  (%): 400 [ $M^+$ ] (6), 105 (100), 77 (74).



IR (ATR): 2982, 2322, 2082, 1903, 1781, 1703, 1642, 1487, 1407, 1299, 1237, 1182, 1110, 1066, 993, 940, 843, 766, 696  $\text{cm}^{-1}$ .

Anal. calcd. for  $\text{C}_{20}\text{H}_{17}\text{BrO}_4$  (400) C, 59.87; H, 4.27; found: C, 59.81; H, 4.31.

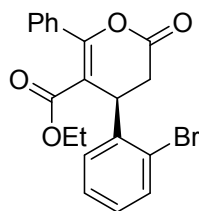

The compound **3o** was prepared according to the general procedure. The product was obtained as a colorless solid (142.5 mg, 74% yield). The ee (79%) was measured by HPLC using a chiral stationary phase [Daicel OD, *n*-heptane:*i*-PrOH = 9:1, 1.0 mL/min),  $t_R$  = 12.16 min (major), 8.50 min (minor)],  $[\alpha]_D^{21} = +216.0$  ( $c = 1.0$ ,  $\text{CHCl}_3$ ).

$^1\text{H}$  NMR (600 MHz,  $\text{CDCl}_3$ )  $\delta$  7.62 (dd,  $J = 7.9, 1.2$  Hz, 1H), 7.58 - 7.54 (m, 2H), 7.50 - 7.41 (m, 3H), 7.29 (td,  $J = 7.5, 1.2$  Hz, 1H), 7.22 (dd,  $J = 7.8, 1.7$  Hz, 1H), 7.15 (td,  $J = 7.6, 1.7$  Hz, 1H), 4.91 (dd,  $J = 7.9, 2.4$  Hz, 1H), 3.98 - 3.89 (m, 2H), 3.08 (dd,  $J = 16.0, 7.9$  Hz, 1H), 2.99 (dd,  $J = 16.0, 2.3$  Hz, 1H), 0.90 (t,  $J = 7.1$  Hz, 3H) ppm;  $^{13}\text{C}$  NMR (151 MHz,  $\text{CDCl}_3$ )  $\delta$  165.84, 165.50, 159.86, 138.15, 133.74, 132.76, 130.35, 129.42, 128.69 (2C), 128.30, 128.05 (2C), 127.28, 123.88, 110.66, 61.09, 38.42, 34.74, 13.49 ppm.

MS (EI, 70 eV)  $m/z$  (%): 400 [ $\text{M}^+$ ] (2), 321 (46), 279 (71), 251 (22), 173 (18), 105 (100), 77 (74).

IR (ATR): 3061, 2983, 2164, 2067, 1784, 1706, 1645, 1464, 1370, 1343, 1300, 1238, 1186, 1119, 1066, 987, 944, 850, 760, 696  $\text{cm}^{-1}$ .

HRMS (ESI): calcd for  $\text{C}_{20}\text{H}_{17}\text{BrO}_4$  [ $\text{M}+\text{Na}$ ] $^+$ : 423.0202; found: 423.0202.

## 5. References

- [1] a) N. E. Wurz, C. G. Daniliuc and F. Glorius, *Chem. Eur. J.*, 2012, **18**, 16297; b) H. U. Vora, S. P. Lathrop, N. T. Reynolds, M. S. Kerr, J. V. R. de Alaniz and T. Rovis, *Org. Synth.*, 2010, **87**, 350; c) J. R. Struble and J. W. Bode, *Org. Synth.*, 2010, **87**, 362; d) K. B. Ling and A. D. Smith, *Chem. Commun.*, 2011, **47**, 373.
- [2] G. Speranza, C. F. Morelli, P. Manitto, *Synthesis*, 2000, 123.

## 6. Copies of NMR spectra and HPLC measurements of the products 3

### $^1\text{H}$ NMR of **3a**

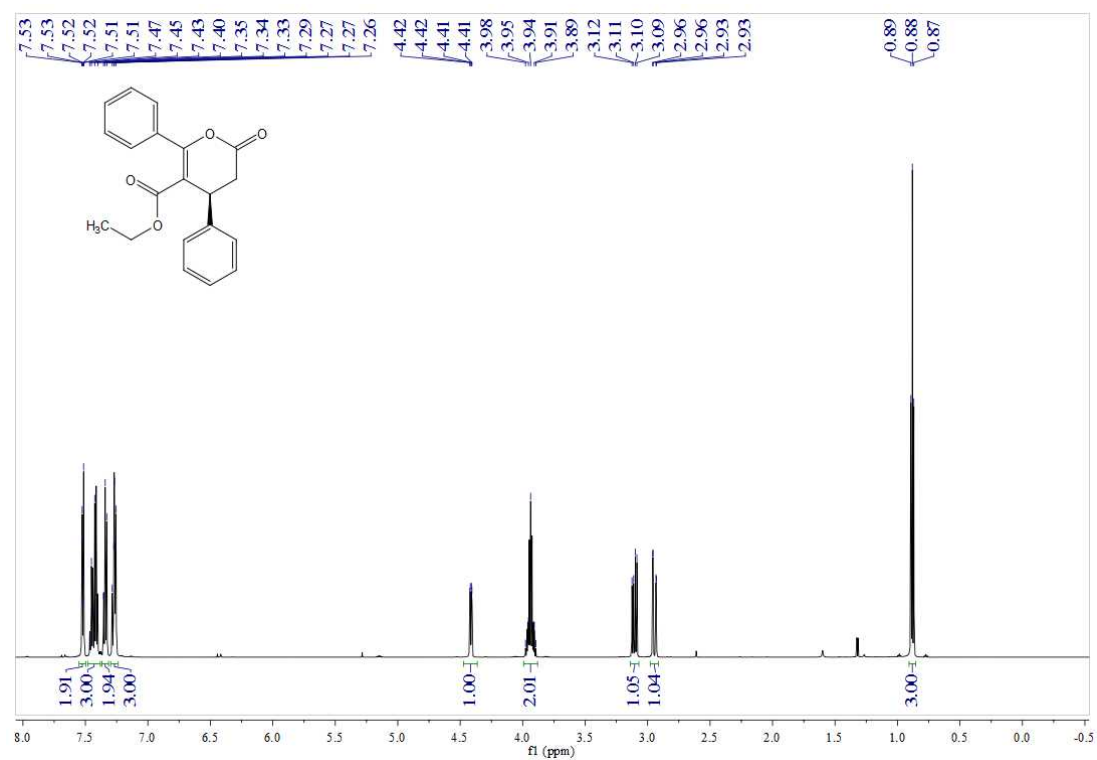

### $^{13}\text{C}$ NMR of **3a**

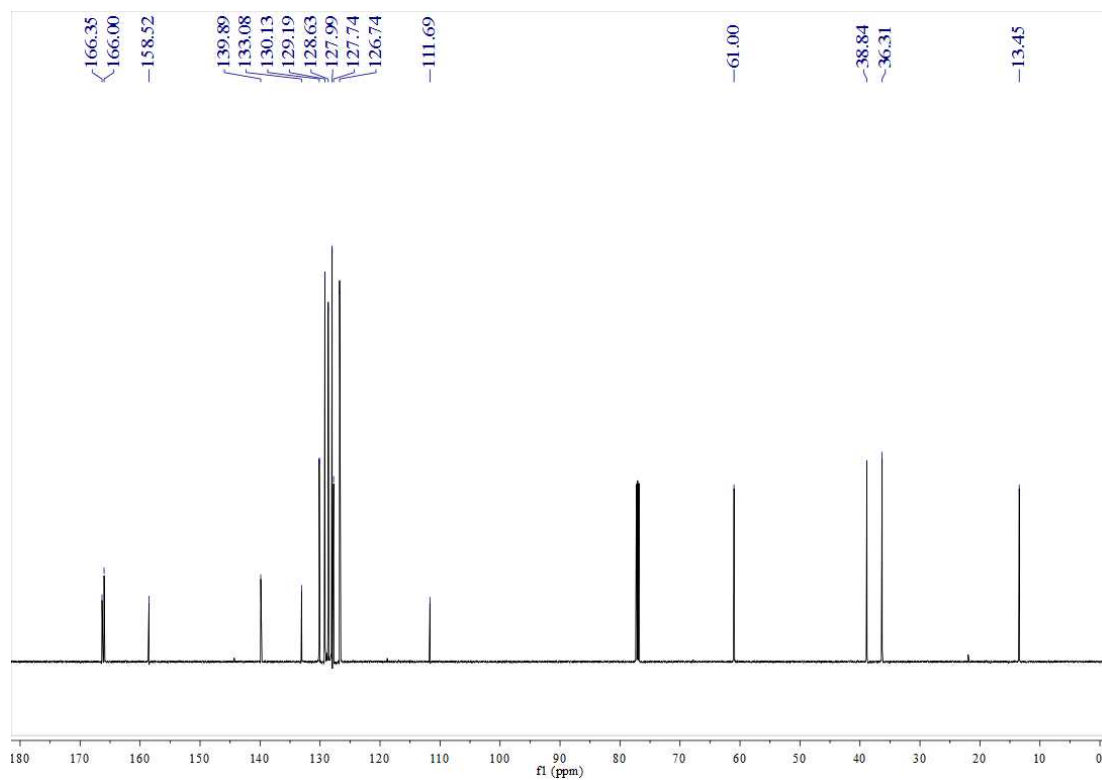

# HPLC analysis: rac-3a

Data file: D:\ERNIE\NI\94ARAS.D  
 Sample Info: Laufmittel: n-Heptan/EtOH 9:1;  
 Die Probe ist in DCM/LM gelöst

Säule: DAICELAS.M  
 Säuleninfo: Chiralpak AS (250 x 4.6)mm 10µ

Operator: Analytik Labor AKEN

Injektion Time: 10:25:40  
 Injektion Date: 08.01.2015

|                        |          |         |
|------------------------|----------|---------|
| Instrument Conditions: | At Start | At Stop |
| Temperature in °C:     | 30.0     | 30.0    |
| Pressure in bar:       | 31.8     | 32.0    |
| Flow in ml/min:        | 1.0      | 1.0     |

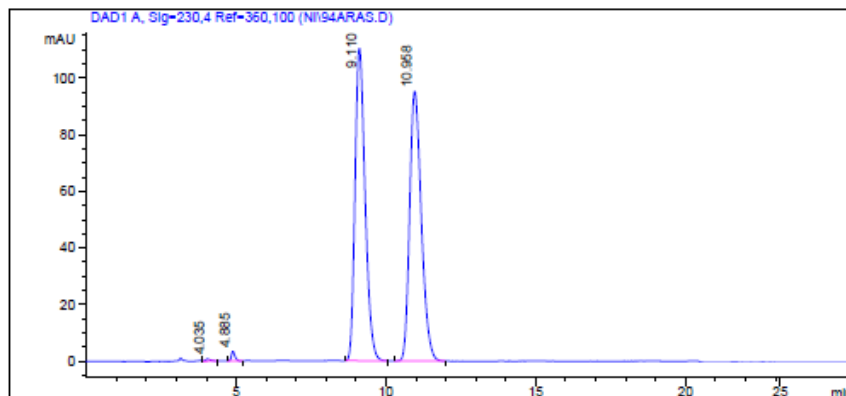

| #     | Ret. Time (min) | Width | Height (mAU) | Area (mAU*s) | Area % |
|-------|-----------------|-------|--------------|--------------|--------|
| 1     | 4.03            | 0.17  | 0.86         | 10.91        | 0.21   |
| 2     | 4.88            | 0.13  | 3.45         | 29.05        | 0.56   |
| 3     | 9.11            | 0.36  | 110.42       | 2580.36      | 49.60  |
| 4     | 10.96           | 0.42  | 95.22        | 2582.19      | 49.63  |
| Total |                 |       |              | 5202.51      | 100.00 |

# Enantioenriched 3a

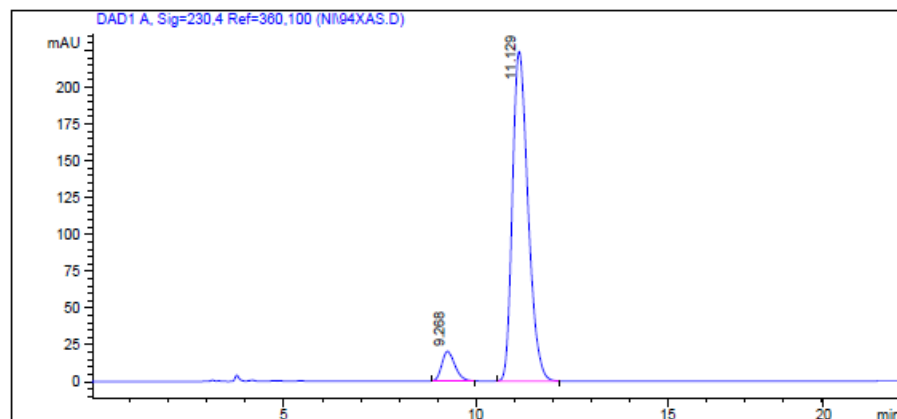

| #     | Ret. Time (min) | Width | Height (mAU) | Area (mAU*s) | Area % |
|-------|-----------------|-------|--------------|--------------|--------|
| 1     | 9.27            | 0.37  | 20.27        | 465.91       | 7.12   |
| 2     | 11.13           | 0.44  | 223.99       | 6334.98      | 92.88  |
| Total |                 |       |              | 6820.89      | 100.00 |

<sup>1</sup>H NMR of **3b**

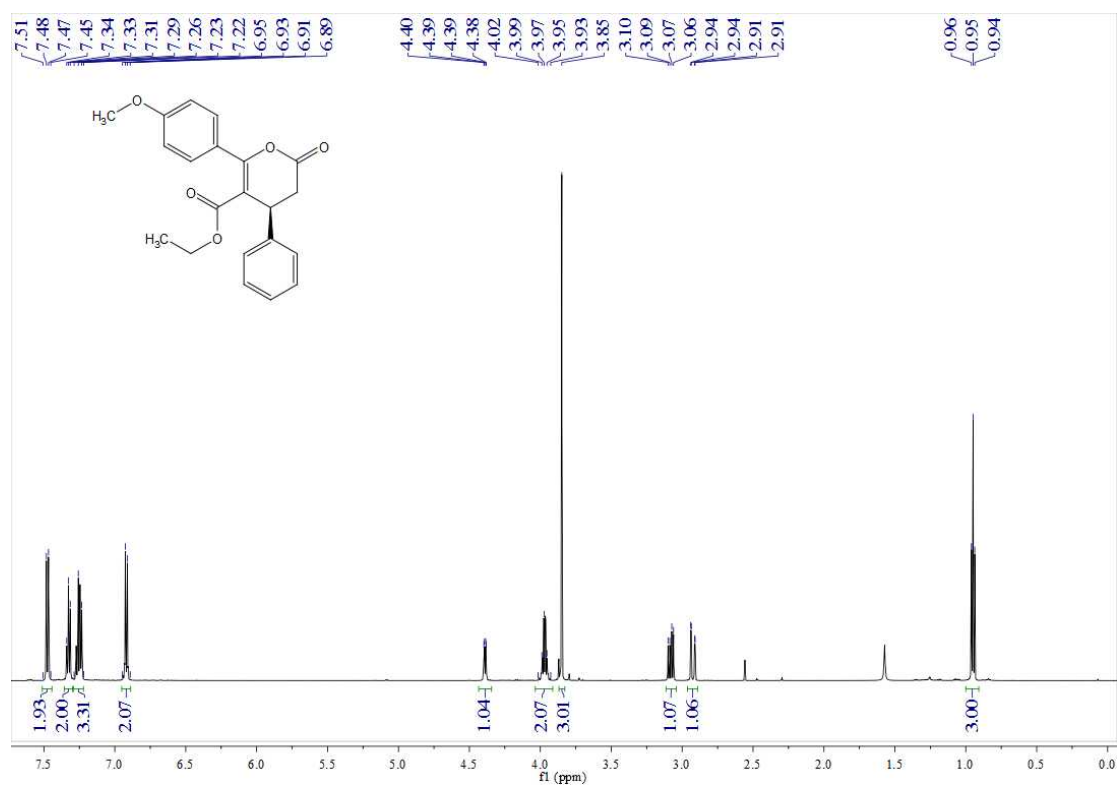

<sup>13</sup>C NMR of **3b**

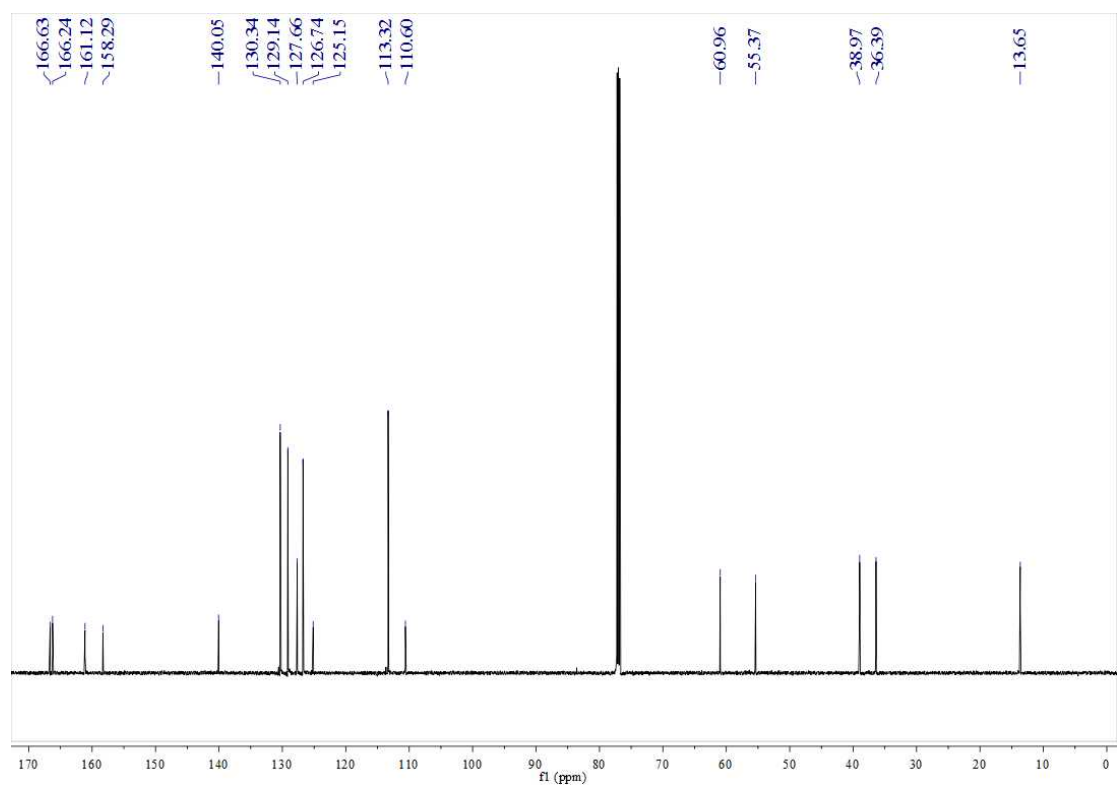

# HPLC analysis: rac-3b

Data file: D:\GONZO\NI\108ARAD.D  
 Sample Info: Laufmittel: n-Heptan/iPrOH 9:1;  
 Die Probe ist in DCM/LM gelöst.

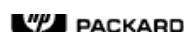

Säule: DAICELAD.M  
 Säuleninfo: Chiralpak AD (250x4,6)mm  
 Operator: Analytik Labor AKEN

Injektion Time: 14:17:30  
 Injektion Date: 28.01.2015

Instrument Conditions: At Start At Stop  
 Temperature in °C: 30.0°C 30.0°C  
 Pressure in bar: 31.9 32.9  
 Flow in ml/min: 1.00 1.00

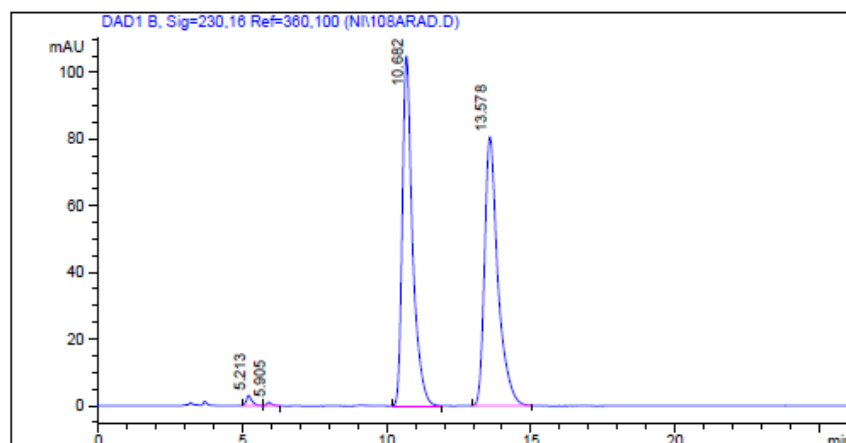

| #     | Ret. Time<br>(min) | Width | Height<br>(mAU) | Area<br>(mAU*s) | Area % |
|-------|--------------------|-------|-----------------|-----------------|--------|
| 1     | 5.21               | 0.20  | 3.06            | 41.71           | 0.80   |
| 2     | 5.91               | 0.18  | 1.08            | 13.10           | 0.25   |
| 3     | 10.68              | 0.37  | 104.99          | 2593.82         | 49.49  |
| 4     | 13.58              | 0.48  | 80.71           | 2592.20         | 49.46  |
| Total |                    |       |                 | 5240.84         | 100.00 |

## Enantioenriched 3b

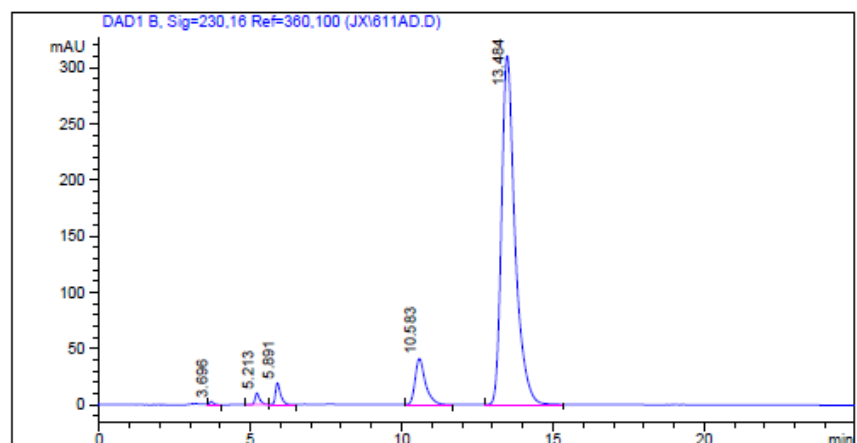

| #     | Ret. Time<br>(min) | Width | Height<br>(mAU) | Area<br>(mAU*s) | Area % |
|-------|--------------------|-------|-----------------|-----------------|--------|
| 1     | 3.70               | 0.13  | 2.99            | 26.00           | 0.24   |
| 2     | 5.21               | 0.16  | 10.39           | 117.23          | 1.07   |
| 3     | 5.89               | 0.17  | 19.50           | 232.00          | 2.12   |
| 4     | 10.58              | 0.35  | 40.95           | 970.68          | 8.87   |
| 5     | 13.48              | 0.46  | 310.80          | 9603.18         | 87.71  |
| Total |                    |       |                 | 10949.09        | 100.00 |

<sup>1</sup>H NMR of **3c**

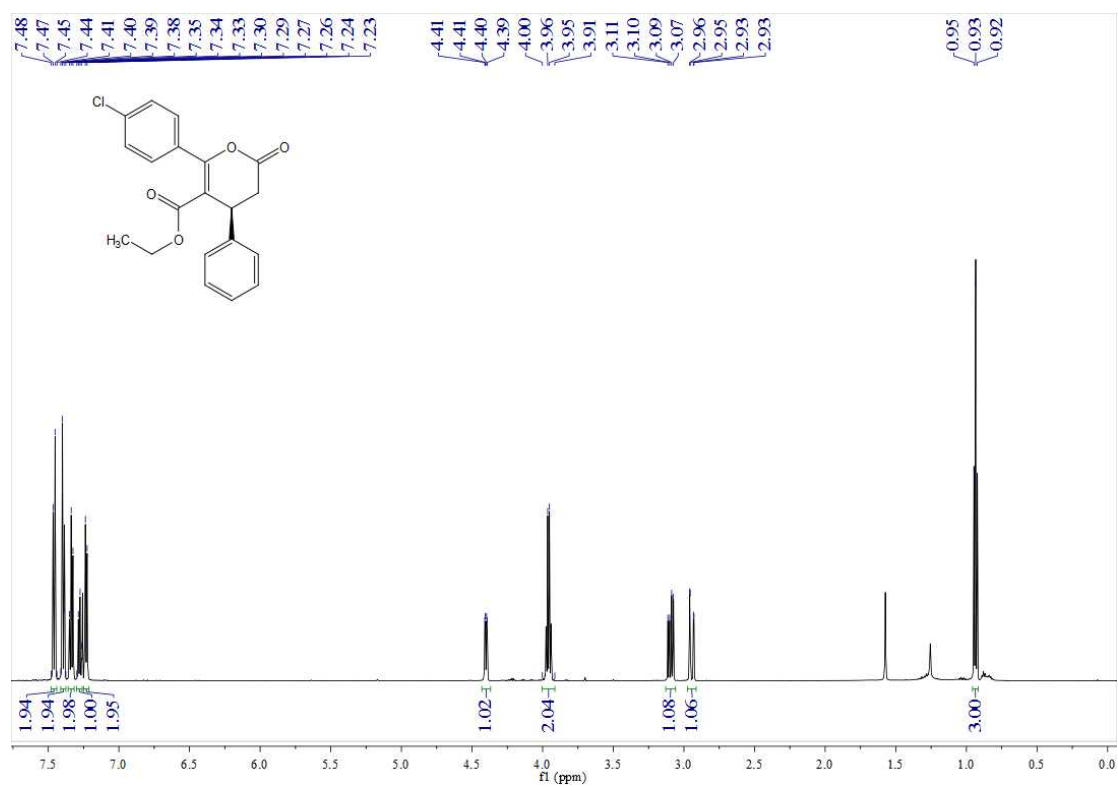

<sup>13</sup>C NMR of **3c**

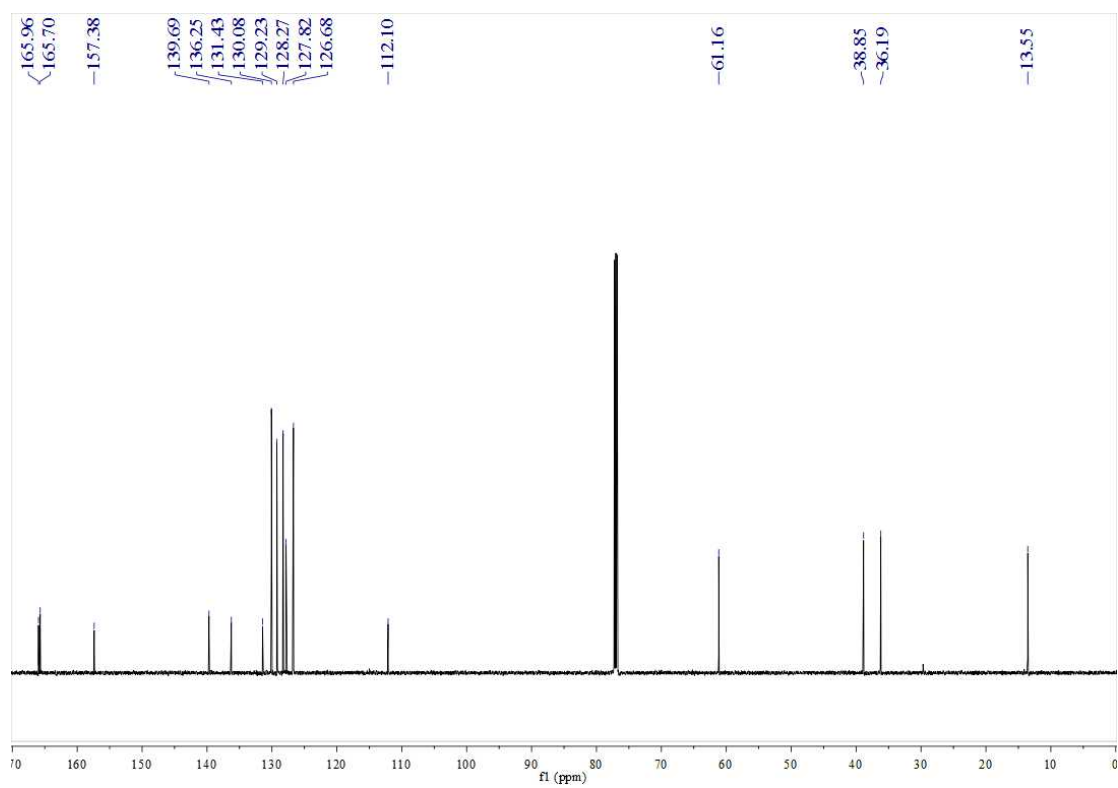

# HPLC analysis: rac-3c

Data file: D:\GONZO\NI\107ARAD.D  
 Sample Info: Laufmittel: n-Heptan/iPrOH 9:1;  
 Die Probe ist in DCM/LM gelöst.

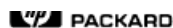

Säule: DAICELAD.M  
 Säuleninfo: Chiralpak AD (250x4,6)mm  
 Operator: Analytik Labor AKEN

Injektion Time: 13:54:24  
 Injektion Date: 28.01.2015

Instrument Conditions: At Start At Stop  
 Temperature in °C: 30.0°C 30.0°C  
 Pressure in bar: 32.0 32.7  
 Flow in ml/min: 1.00 1.00

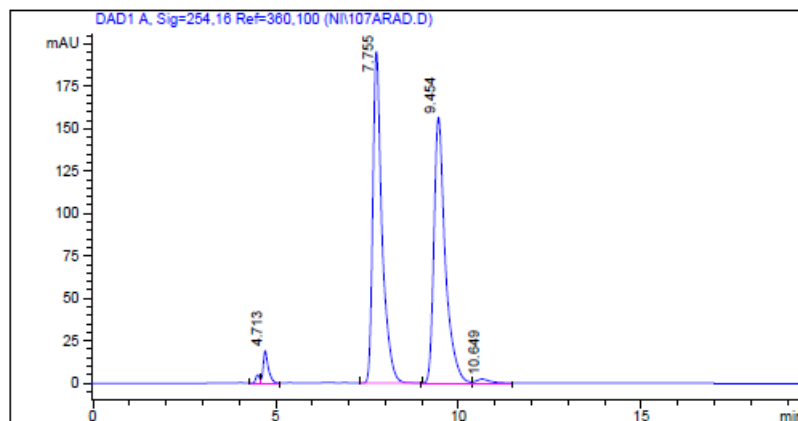

| #     | Ret. Time (min) | Width | Height (mAU) | Area (mAU*s) | Area % |
|-------|-----------------|-------|--------------|--------------|--------|
| 1     | 4.50            | 0.11  | 4.89         | 35.78        | 0.50   |
| 2     | 4.71            | 0.14  | 19.09        | 184.90       | 2.61   |
| 3     | 7.76            | 0.26  | 195.45       | 3427.11      | 48.36  |
| 4     | 9.45            | 0.32  | 156.58       | 3378.77      | 47.68  |
| 5     | 10.65           | 0.38  | 2.34         | 60.03        | 0.85   |
| Total |                 |       |              | 7086.59      | 100.00 |

## Enantioenriched 3c

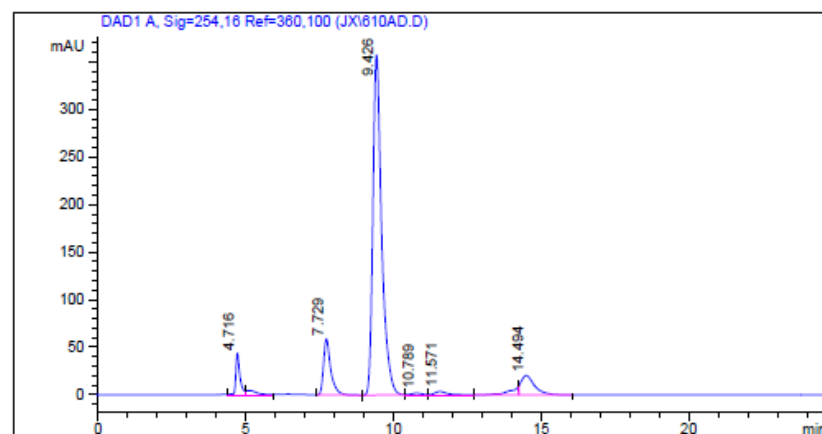

| #     | Ret. Time (min) | Width | Height (mAU) | Area (mAU*s) | Area % |
|-------|-----------------|-------|--------------|--------------|--------|
| 1     | 4.72            | 0.15  | 42.43        | 430.56       | 4.33   |
| 2     | 5.13            | 0.37  | 4.62         | 116.64       | 1.17   |
| 3     | 7.73            | 0.26  | 58.70        | 1009.51      | 10.16  |
| 4     | 9.43            | 0.31  | 357.26       | 7387.30      | 74.31  |
| 5     | 10.79           | 0.42  | 1.88         | 54.16        | 0.54   |
| 6     | 11.57           | 0.43  | 3.69         | 112.29       | 1.13   |
| 7     | 14.23           | 0.34  | 9.10         | 186.08       | 1.87   |
| 8     | 14.49           | 0.53  | 20.32        | 644.13       | 6.48   |
| Total |                 |       |              | 9940.67      | 100.00 |

<sup>1</sup>H NMR of **3d**

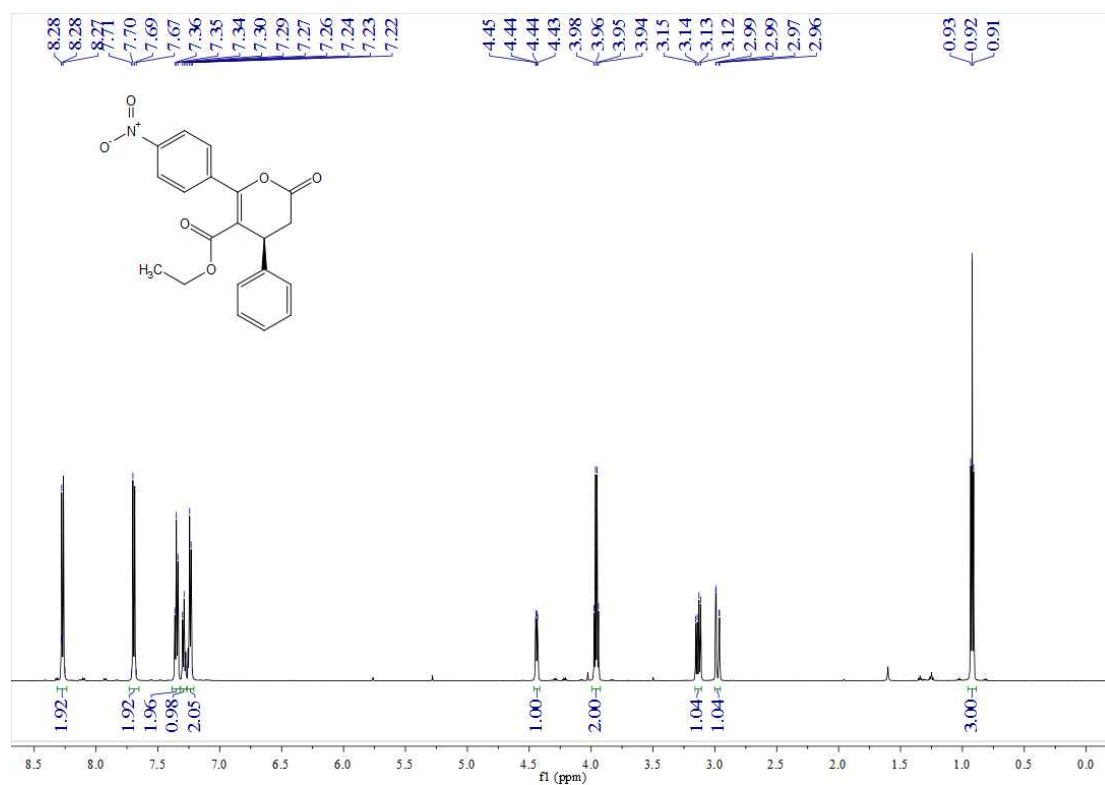

<sup>13</sup>C NMR of **3d**

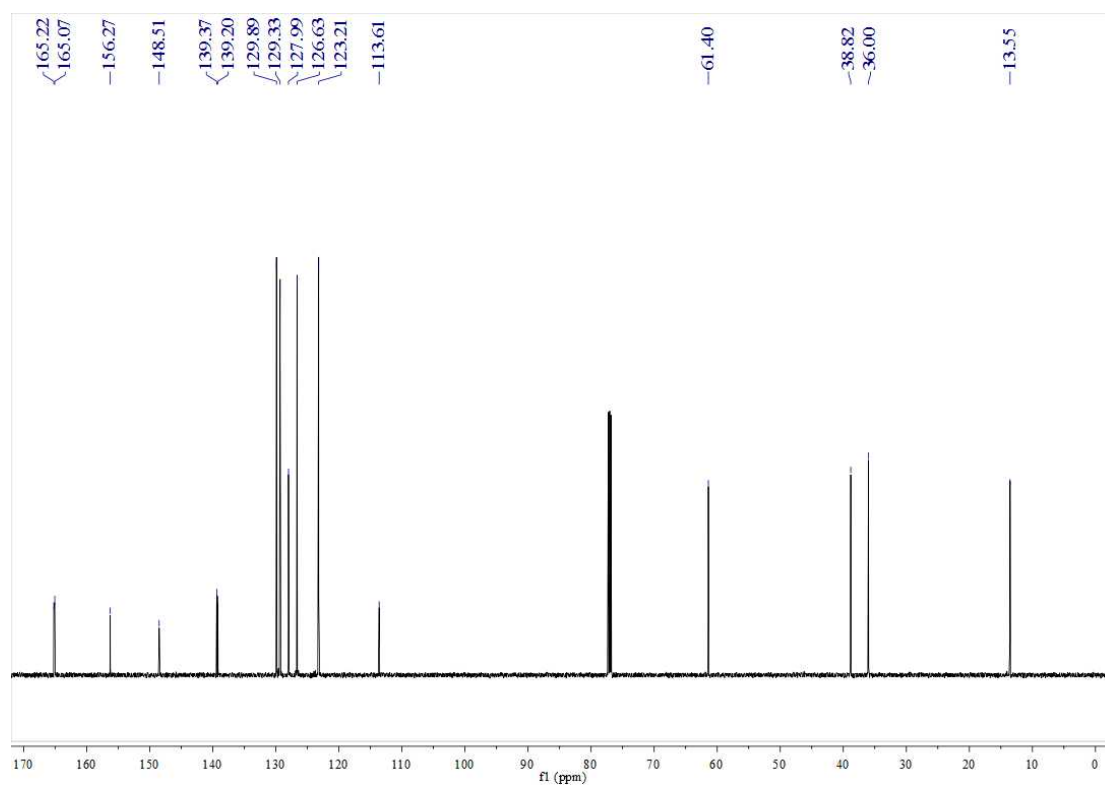



# HPLC analysis: rac-3d

Data file: D:\BERT\NI\103AR1W.D  
 Sample Info: Laufmittel: n-Heptan/EtOH 7:3;  
 Die Probe ist in DCM/LM gelöst

Säule: WHELK.M  
 Säuleninfo: (s,s)-WHELK 01 (250x4,6)mm

Operator: Analytik Labor AKEN

Injektion Time: 09:20:37  
 Injektion Date: 23.01.2015

| Instrument Conditions: | At Start | At Stop |
|------------------------|----------|---------|
| Temperature in °C:     | 30.0     | 30.0    |
| Pressure in bar:       | 32.1     | 31.9    |
| Flow in ml/min:        | 0.5      | 0.5     |

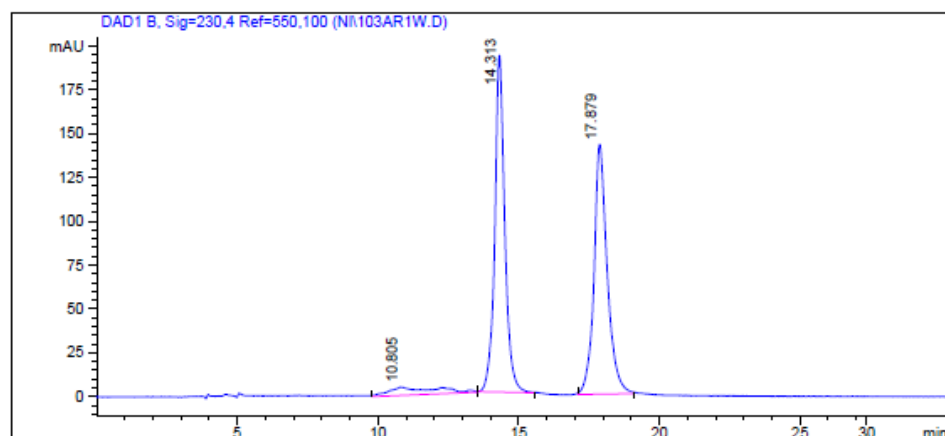

| #     | Ret. Time (min) | Width | Height (mAU) | Area (mAU*s) | Area % |
|-------|-----------------|-------|--------------|--------------|--------|
| 1     | 10.80           | 1.89  | 4.79         | 543.25       | 5.45   |
| 2     | 14.31           | 0.41  | 192.17       | 4771.17      | 47.86  |
| 3     | 17.88           | 0.47  | 142.52       | 4654.96      | 46.69  |
| Total |                 |       |              | 9969.38      | 100.00 |

## Enantioenriched 3d

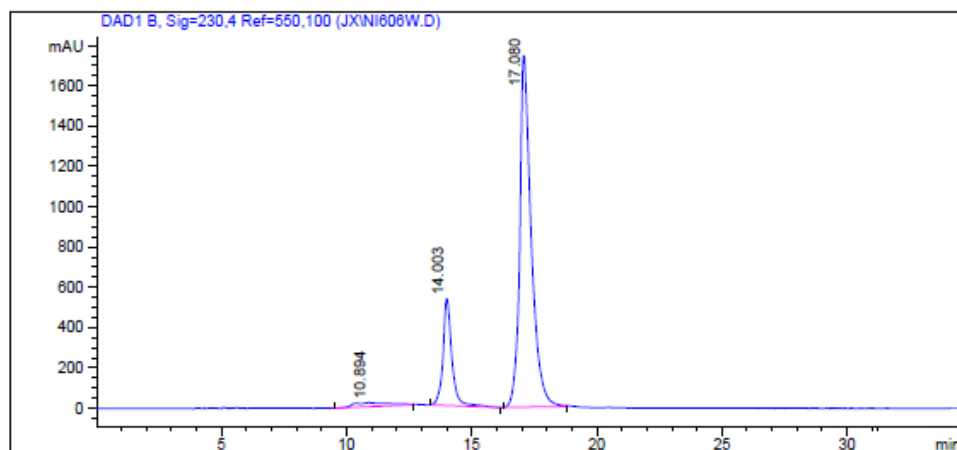

| #     | Ret. Time (min) | Width | Height (mAU) | Area (mAU*s) | Area % |
|-------|-----------------|-------|--------------|--------------|--------|
| 1     | 10.89           | 1.22  | 20.42        | 2074.81      | 2.92   |
| 2     | 14.00           | 0.36  | 530.83       | 13148.85     | 18.53  |
| 3     | 17.08           | 0.45  | 1743.92      | 55753.09     | 78.55  |
| Total |                 |       |              | 70976.74     | 100.00 |

<sup>1</sup>H NMR of **3e**

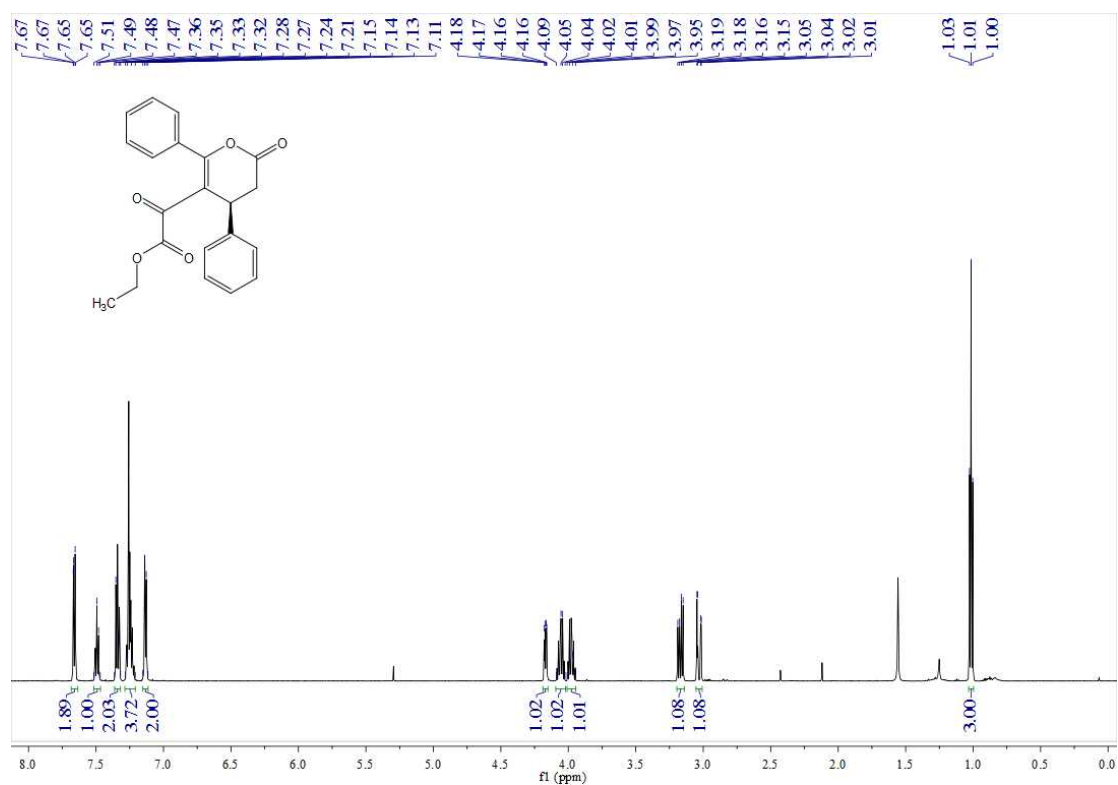

<sup>13</sup>C NMR of **3e**

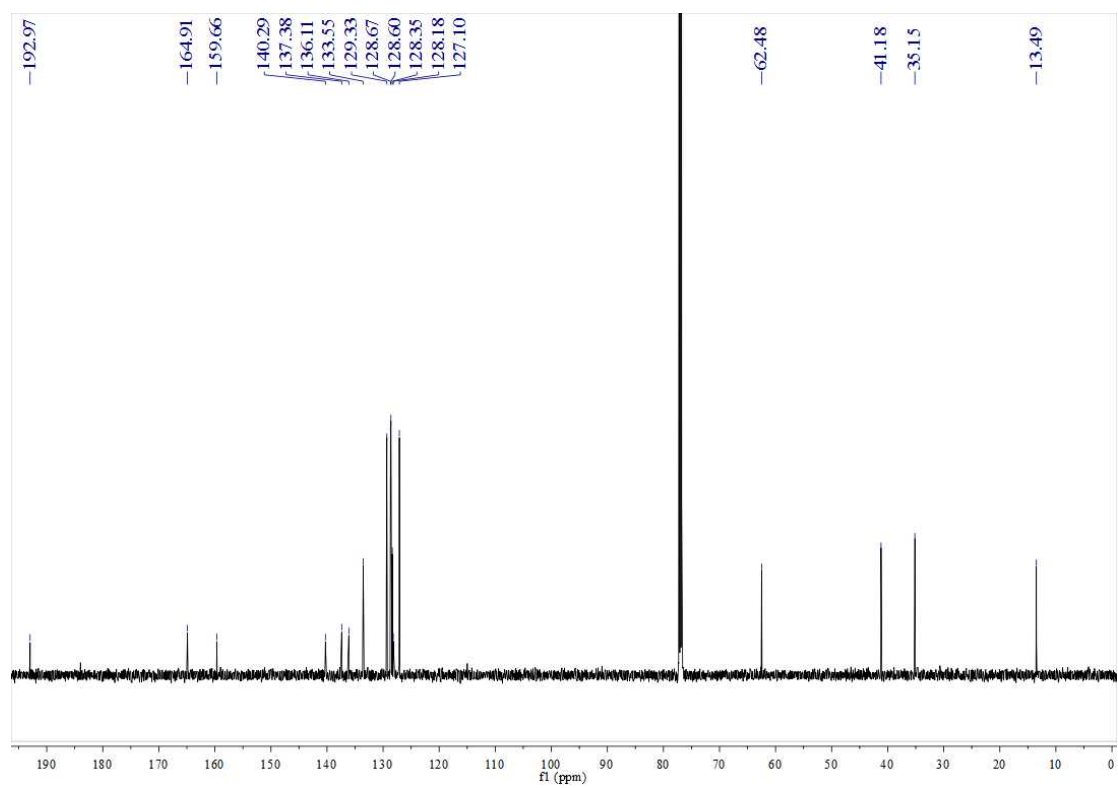

# HPLC analysis: rac-3e

Data file: D:\GONZO\NI\104AR1AD.D  
 Sample Info: Laufmittel: n-Heptan/iPrOH 7:3;  
 Die Probe ist in DCM/LM gelöst.

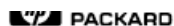

Säule: DAICELAD.M  
 Säuleninfo: Chiralpak AD (250x4,6)mm  
 Operator: Analytik Labor AKEN

Injektion Time: 09:28:07  
 Injektion Date: 26.01.2015

Instrument Conditions: At Start At Stop  
 Temperature in °C: 30.0°C 30.0°C  
 Pressure in bar: 28.1 28.7  
 Flow in ml/min: 0.70 0.70

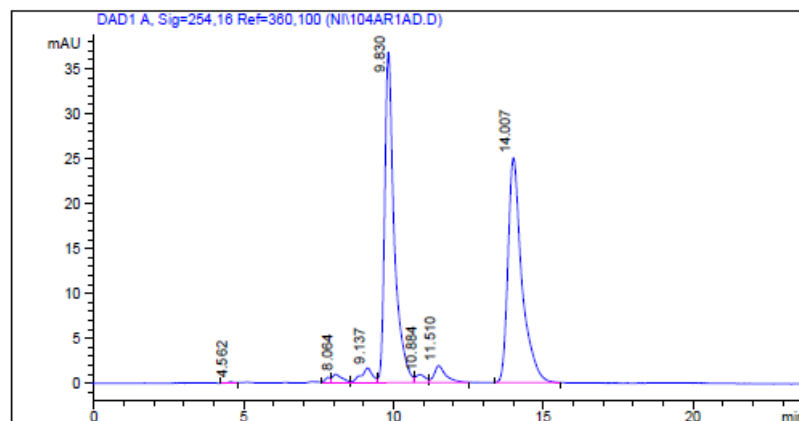

| #     | Ret. Time<br>(min) | Width | Height<br>(mAU) | Area<br>(mAU*s) | Area % |
|-------|--------------------|-------|-----------------|-----------------|--------|
| 1     | 4.56               | 0.16  | 0.16            | 2.11            | 0.12   |
| 2     | 7.81               | 0.17  | 0.60            | 7.72            | 0.44   |
| 3     | 8.06               | 0.30  | 0.95            | 22.01           | 1.24   |
| 4     | 9.14               | 0.36  | 1.65            | 43.35           | 2.45   |
| 5     | 9.83               | 0.33  | 36.78           | 818.81          | 46.23  |
| 6     | 10.88              | 0.30  | 0.90            | 20.50           | 1.16   |
| 7     | 11.51              | 0.38  | 1.88            | 50.28           | 2.84   |
| 8     | 14.01              | 0.47  | 25.02           | 806.27          | 45.53  |
| Total |                    |       |                 | 1771.05         | 100.00 |

## Enantioenriched 3e

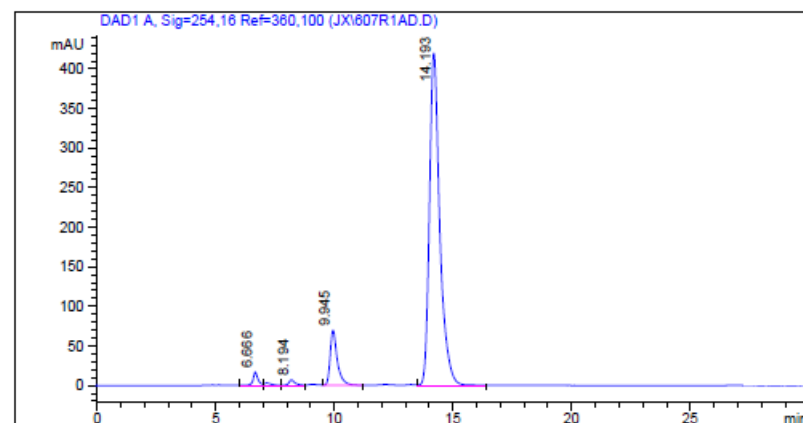

| #     | Ret. Time<br>(min) | Width | Height<br>(mAU) | Area<br>(mAU*s) | Area % |
|-------|--------------------|-------|-----------------|-----------------|--------|
| 1     | 6.67               | 0.22  | 16.75           | 245.14          | 1.68   |
| 2     | 7.15               | 0.30  | 3.10            | 65.99           | 0.45   |
| 3     | 8.19               | 0.28  | 6.87            | 131.53          | 0.90   |
| 4     | 9.95               | 0.31  | 69.35           | 1468.18         | 10.05  |
| 5     | 14.19              | 0.45  | 419.45          | 12700.59        | 86.92  |
| Total |                    |       |                 | 14611.42        | 100.00 |

<sup>1</sup>H NMR of **3f**

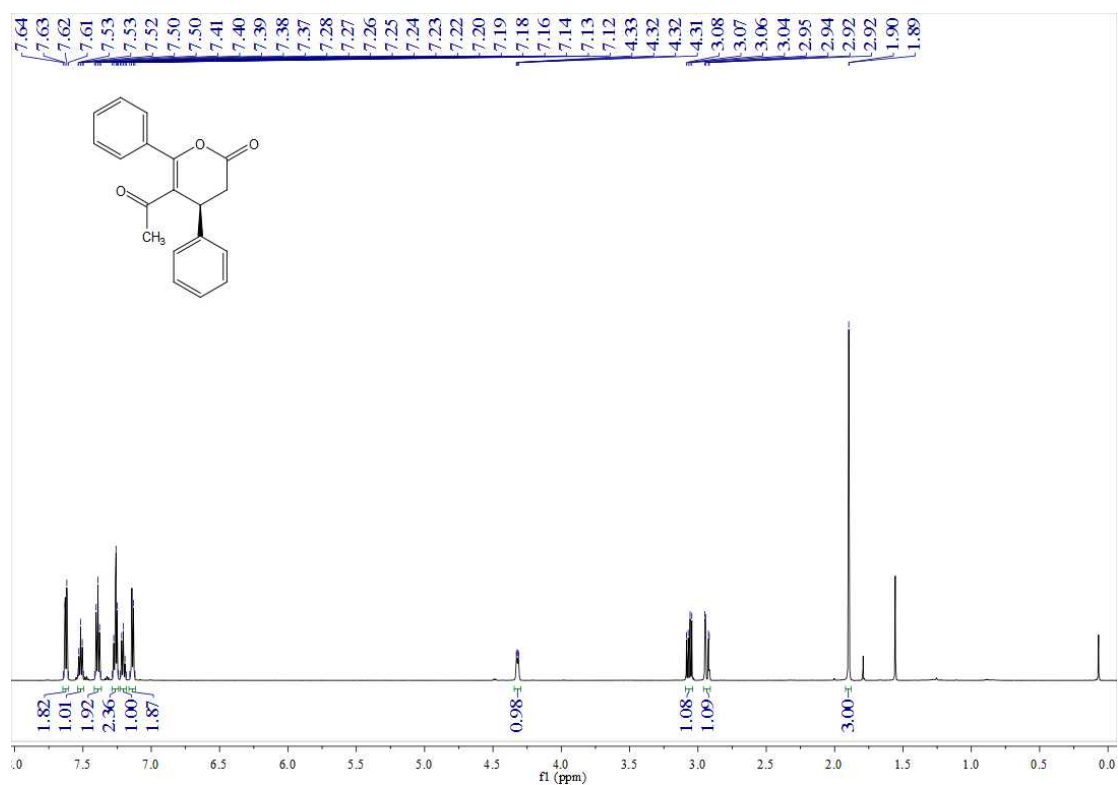

<sup>13</sup>C NMR of **3f**

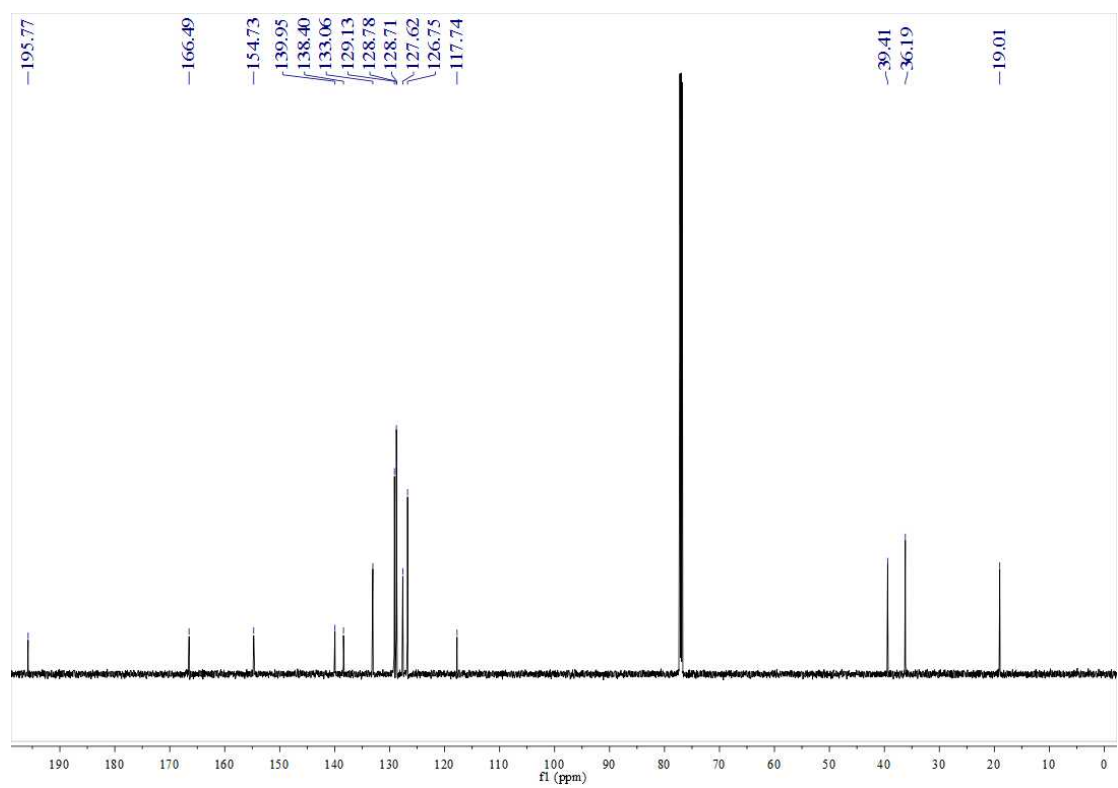

# HPLC analysis: rac-3f

Sample Name: Ni 91 A rac  
Data file: E:\BERT\NI\91AROJ.D  
Sample Info: Laufmittel: n-Heptan/EtOH 8:2;  
Die Probe ist in DCM/LM gelöst

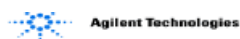

Säule: DAICEL OJ.M  
Säuleninfo: (250 x 4.6) mm 10µ  
Operator: Analytik Labor AKEN

->

Injektion Time: 13:05:15  
Injektion Date: 10.10.2014

| Instrument Conditions: | At Start | At Stop |
|------------------------|----------|---------|
| Temperature in °C:     | 30.0     | 30.0    |
| Pressure in bar:       | 42.7     | 41.4    |
| Flow in ml/min:        | 1.0      | 1.0     |

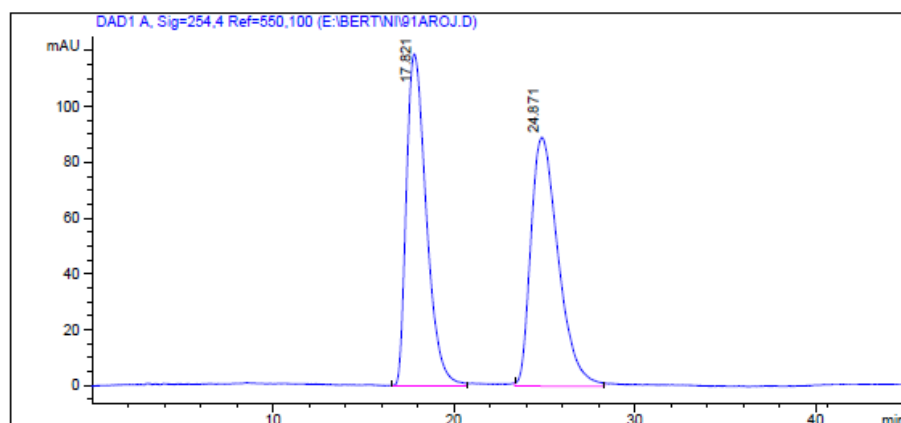

| #     | Ret. Time (min) | Width | Height (mAU) | Area (mAU*s) | Area % |
|-------|-----------------|-------|--------------|--------------|--------|
| 1     | 17.82           | 1.16  | 118.87       | 9111.51      | 49.25  |
| 2     | 24.87           | 1.58  | 89.12        | 9388.86      | 50.75  |
| Total |                 |       |              | 18500.38     | 100.00 |

## Enantioenriched 3f

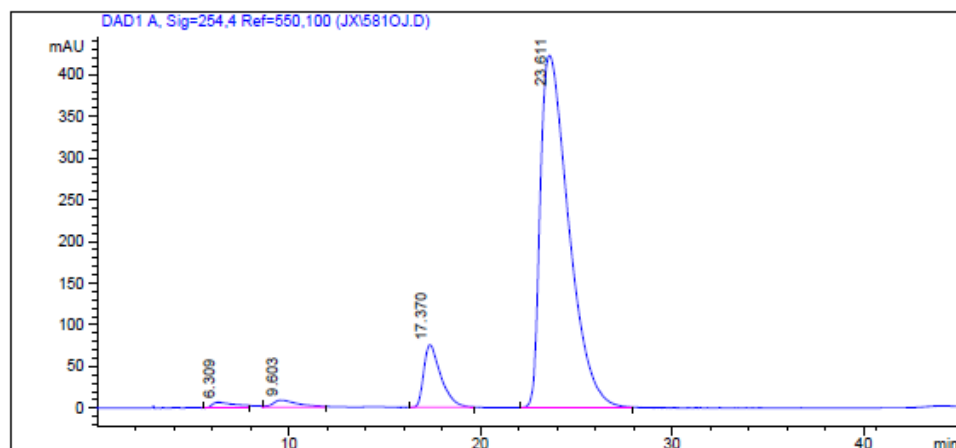

| #     | Ret. Time (min) | Width | Height (mAU) | Area (mAU*s) | Area % |
|-------|-----------------|-------|--------------|--------------|--------|
| 1     | 6.31            | 1.12  | 6.43         | 536.24       | 1.08   |
| 2     | 9.60            | 1.32  | 8.53         | 799.00       | 1.61   |
| 3     | 17.37           | 0.93  | 75.08        | 4677.73      | 9.45   |
| 4     | 23.61           | 1.55  | 422.18       | 43475.18     | 87.85  |
| Total |                 |       |              | 49488.15     | 100.00 |

<sup>1</sup>H NMR of **3g**

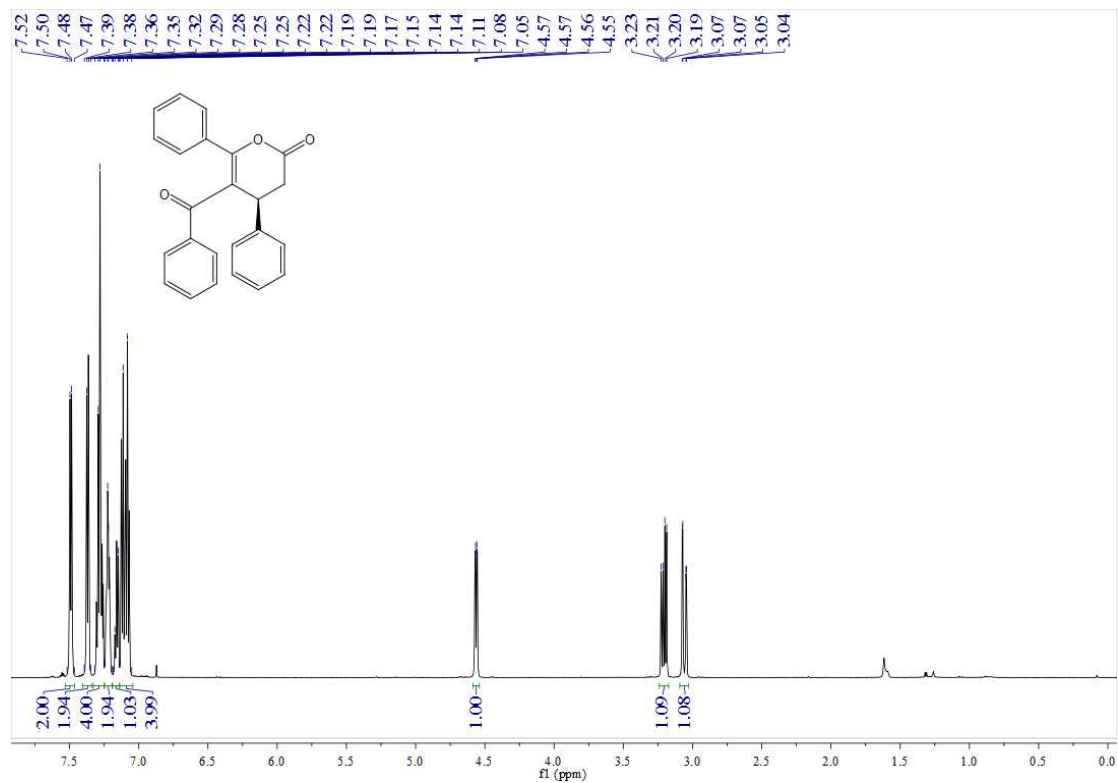

<sup>13</sup>C NMR of **3g**

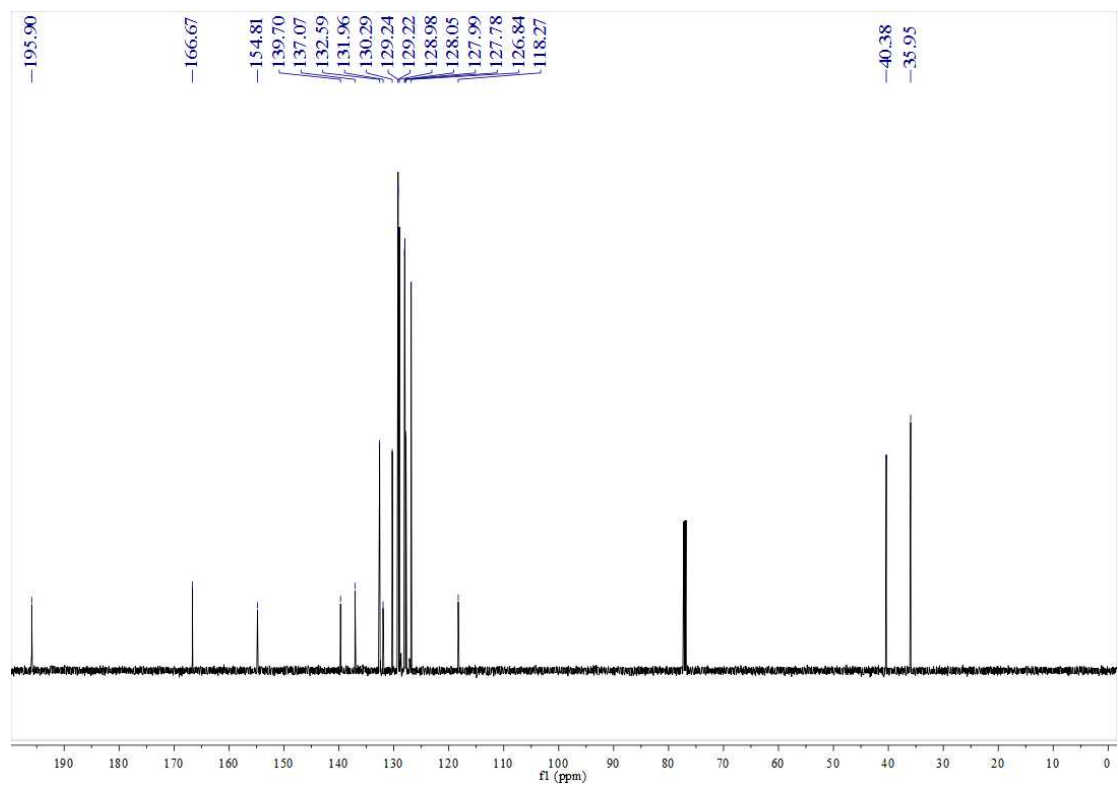

# HPLC analysis: rac-3g

Data file: D:\ERNIE\NI\99ARNW.D  
 Sample Info: Laufmittel: n-Heptan/EtOH 7:3;  
 Die Probe ist in DCM/LM gelöst

Säule: WHELK.M  
 Säuleninfo: (250x4)mm

Operator: Analytik Labor AKEN

Injektion Time: 11:28:47  
 Injektion Date: 27.02.2015

|                        |          |         |
|------------------------|----------|---------|
| Instrument Conditions: | At Start | At Stop |
| Temperature in °C:     | 30.0     | 30.0    |
| Pressure in bar:       | 48.1     | 48.1    |
| Flow in ml/min:        | 0.7      | 0.7     |

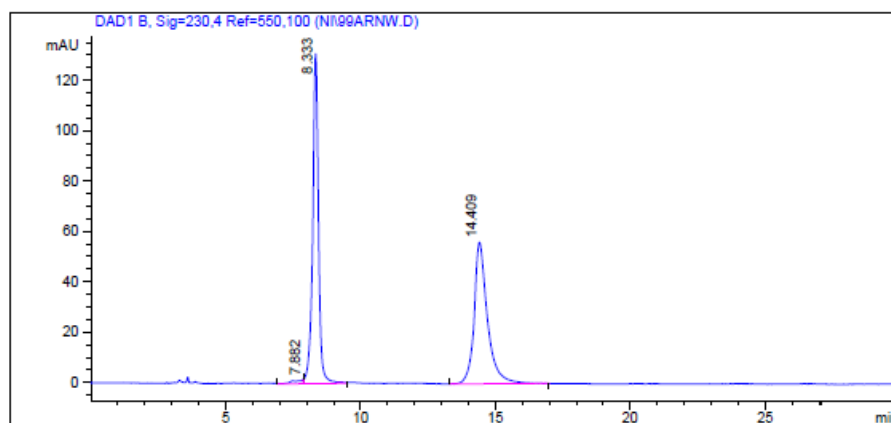

| #     | Ret. Time (min) | Width | Height (mAU) | Area (mAU*s) | Area % |
|-------|-----------------|-------|--------------|--------------|--------|
| 1     | 7.88            | 0.48  | 1.62         | 46.56        | 1.18   |
| 2     | 8.33            | 0.25  | 131.23       | 1969.85      | 49.93  |
| 3     | 14.41           | 0.57  | 56.27        | 1928.99      | 48.89  |
| Total |                 |       |              | 3945.40      | 100.00 |

## Enantioenriched 3g

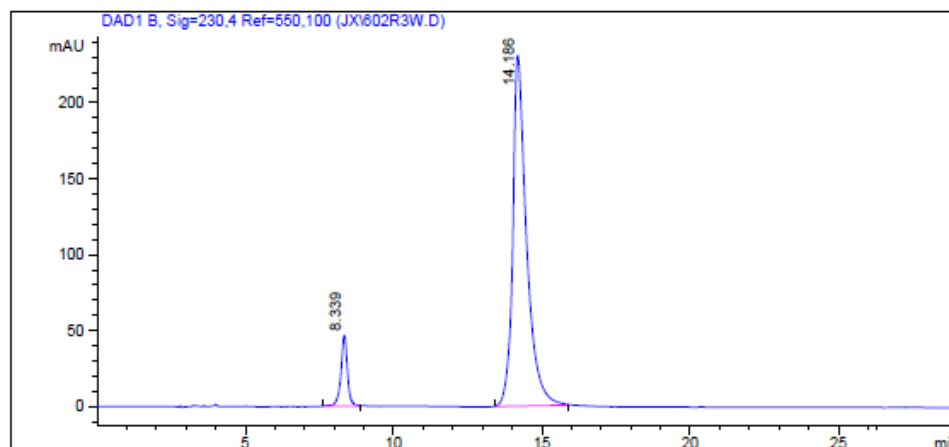

| #     | Ret. Time (min) | Width | Height (mAU) | Area (mAU*s) | Area % |
|-------|-----------------|-------|--------------|--------------|--------|
| 1     | 8.34            | 0.23  | 46.77        | 718.19       | 8.77   |
| 2     | 14.19           | 0.46  | 231.26       | 7474.65      | 91.23  |
| Total |                 |       |              | 8192.84      | 100.00 |

<sup>1</sup>H NMR of **3h**

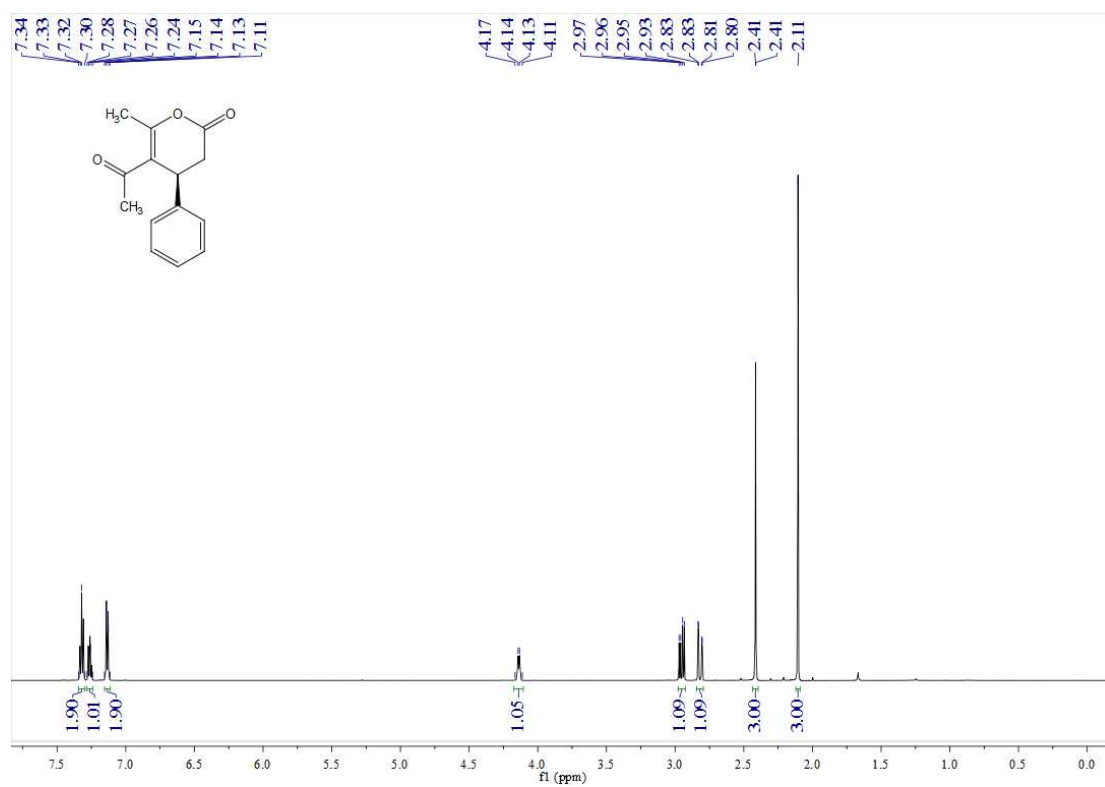

<sup>13</sup>C NMR of **3h**

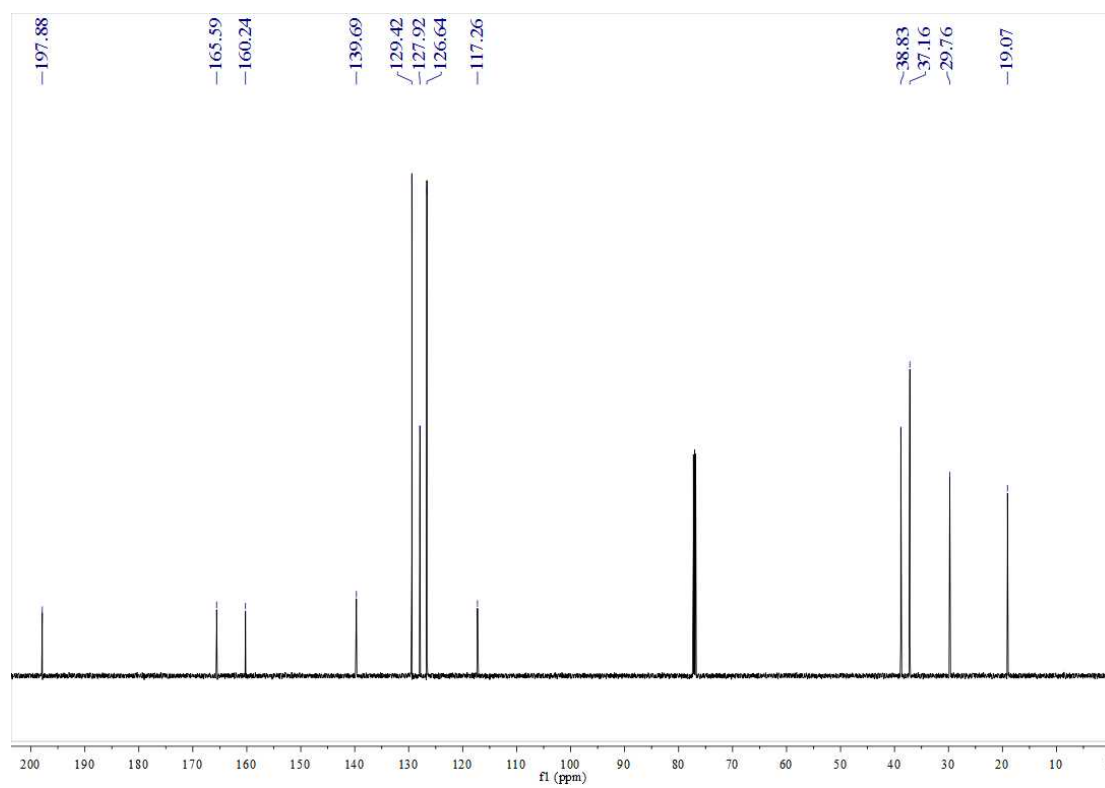



# HPLC analysis: rac-3h

Data file: D:\BERT\NI\98ARW.D  
 Sample Info: Laufmittel: n-Heptan/EtOH 9:1;  
 Die Probe ist in DCM/LM gelöst

Säule: WHELK.M  
 Säuleninfo: (s,s)-WHELK O1 (250x4,6)mm

Operator: Analytik Labor AKEN

Injektion Time: 10:23:16  
 Injektion Date: 14.01.2015

Instrument Conditions: At Start At Stop

Temperature in °C: 30.0 30.0  
 Pressure in bar: 52.1 51.6  
 Flow in ml/min: 1.0 1.0

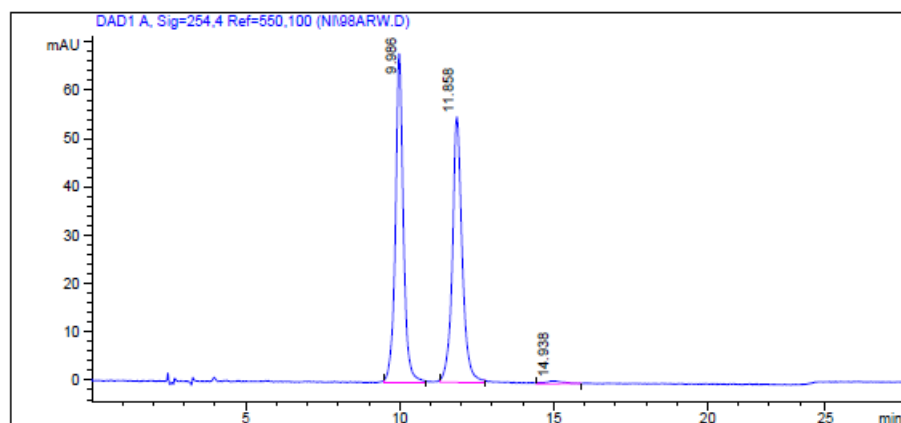

| #     | Ret. Time (min) | Width | Height (mAU) | Area (mAU*s) | Area % |
|-------|-----------------|-------|--------------|--------------|--------|
| 1     | 9.99            | 0.27  | 67.93        | 1225.23      | 49.68  |
| 2     | 11.86           | 0.33  | 54.97        | 1216.75      | 49.33  |
| 3     | 14.94           | 0.64  | 0.64         | 24.43        | 0.99   |
| Total |                 |       |              | 2466.41      | 100.00 |

## Enantioenriched 3h

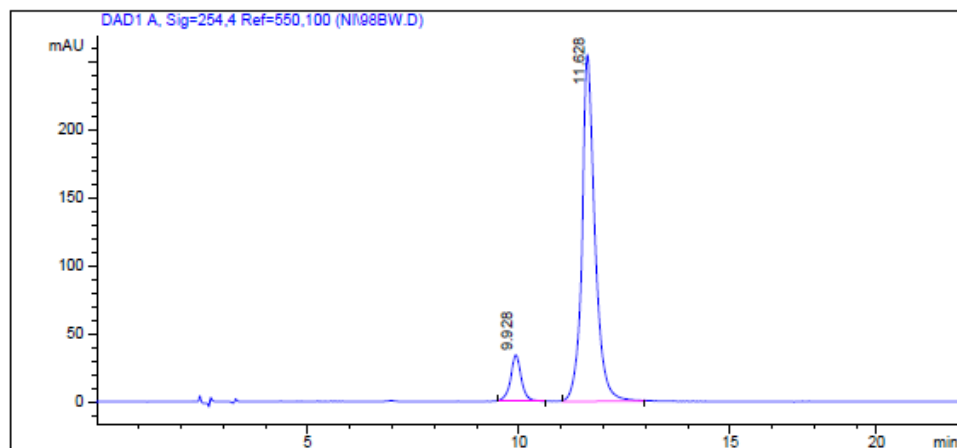

| #     | Ret. Time (min) | Width | Height (mAU) | Area (mAU*s) | Area % |
|-------|-----------------|-------|--------------|--------------|--------|
| 1     | 9.93            | 0.27  | 34.05        | 612.11       | 10.12  |
| 2     | 11.63           | 0.32  | 251.55       | 5437.39      | 89.88  |
| Total |                 |       |              | 6049.50      | 100.00 |

<sup>1</sup>H NMR of **3i**

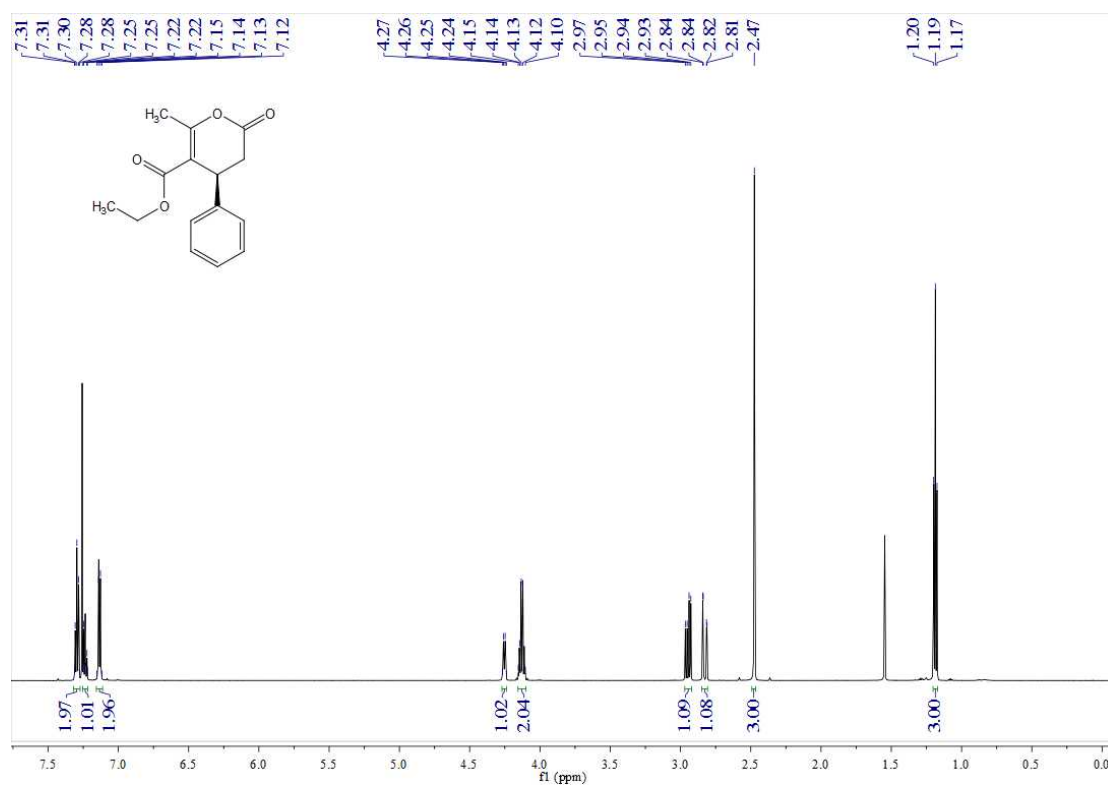

<sup>13</sup>C NMR of **3i**

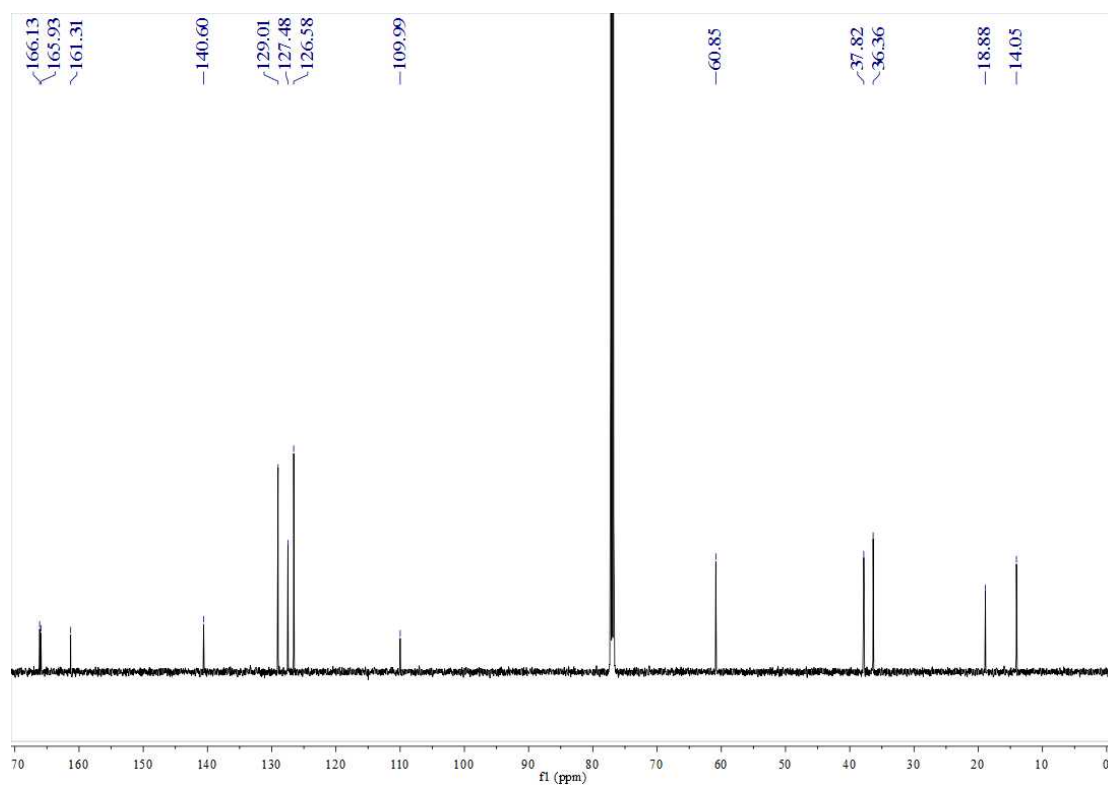

# HPLC analysis: rac-3i

Data file: D:\BERT\NI\95ARW.D  
 Sample Info: Laufmittel: n-Heptan/EtOH 7:3;  
 Die Probe ist in DCM/LM gelöst

Säule: WHELK.M  
 Säuleninfo: (s,s)-WHELK 01 (250x4,6)mm

Operator: Analytik Labor AKEN

Injektion Time: 09:54:50  
 Injektion Date: 09.01.2015

Instrument Conditions: At Start At Stop

Temperature in °C: 30.0 30.0  
 Pressure in bar: 46.0 45.7  
 Flow in ml/min: 0.7 0.7

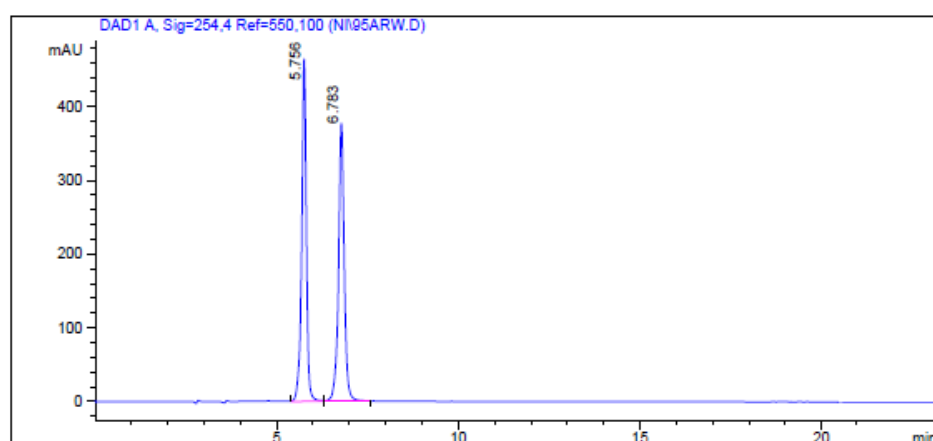

| #     | Ret. Time (min) | Width | Height (mAU) | Area (mAU*s) | Area % |
|-------|-----------------|-------|--------------|--------------|--------|
| 1     | 5.76            | 0.15  | 458.38       | 4175.62      | 49.90  |
| 2     | 6.78            | 0.18  | 371.93       | 4191.99      | 50.10  |
| Total |                 |       |              | 8367.61      | 100.00 |

## Enantioenriched 3i

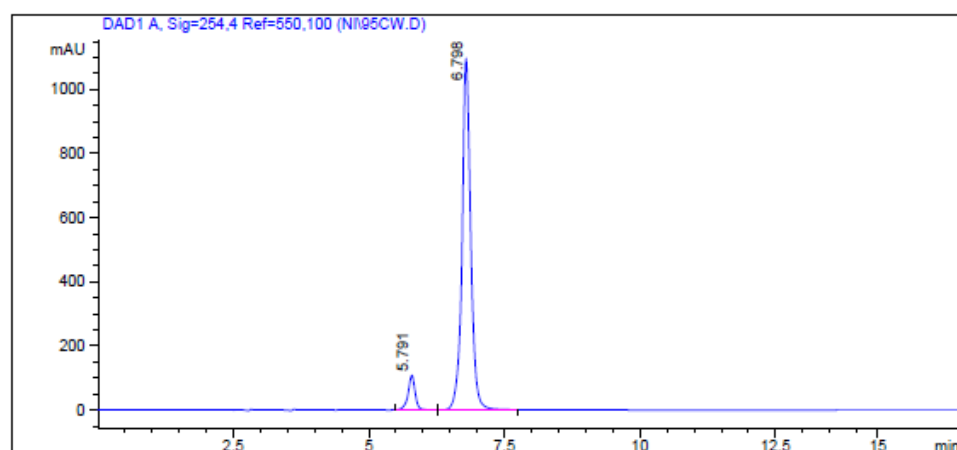

| #     | Ret. Time (min) | Width | Height (mAU) | Area (mAU*s) | Area % |
|-------|-----------------|-------|--------------|--------------|--------|
| 1     | 5.79            | 0.16  | 106.36       | 982.88       | 7.43   |
| 2     | 6.80            | 0.18  | 1095.33      | 12240.82     | 92.57  |
| Total |                 |       |              | 13223.69     | 100.00 |

<sup>1</sup>H NMR of **3j**

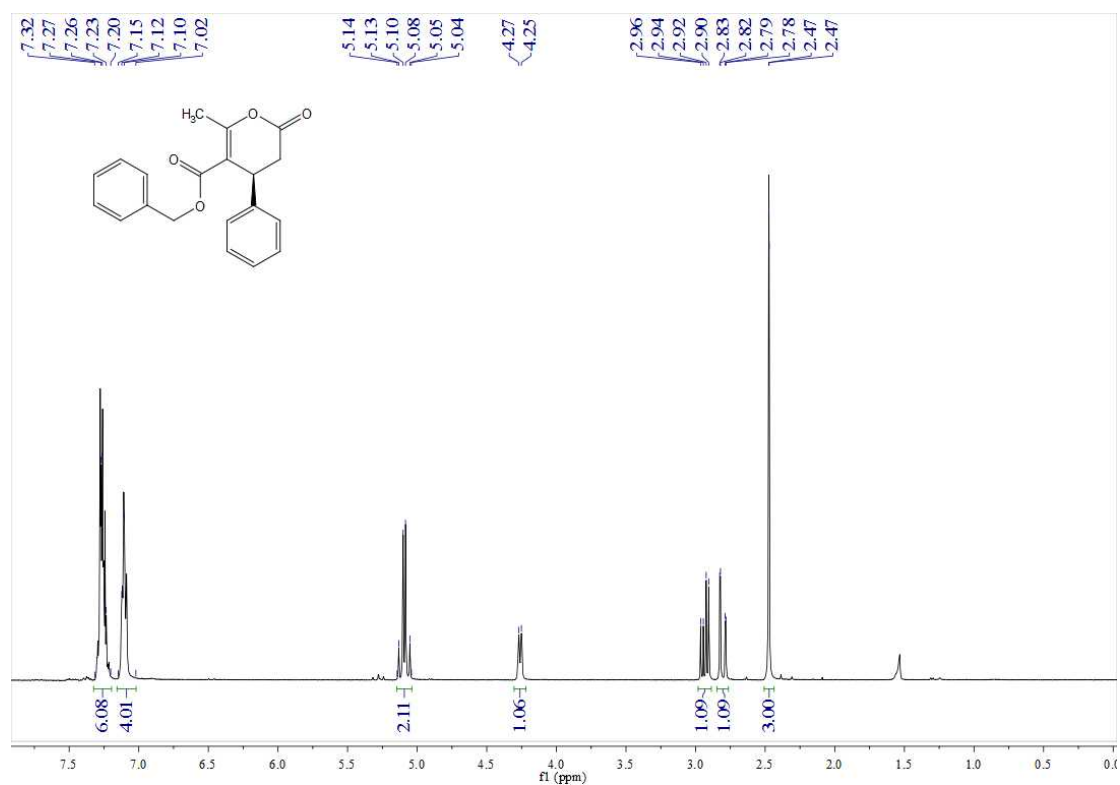

<sup>13</sup>C NMR of **3j**

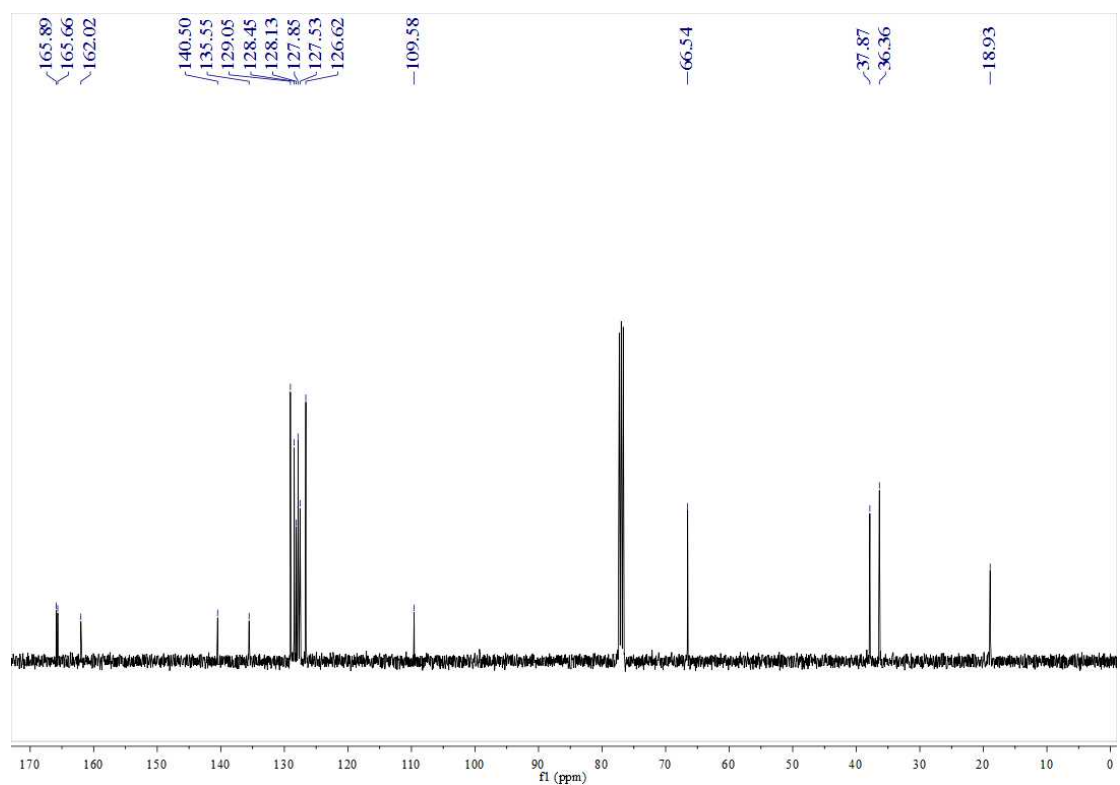

# HPLC analysis: rac-3j

Data file: D:\BERT\NI\102ARW.D  
 Sample Info: Laufmittel: n-Heptan/EtOH 7:3;  
 Die Probe ist in DCM/LM gelöst

Säule: WHELK.M  
 Säuleninfo: (s,s)-WHELK 01 (250x4,6)mm

Operator: Analytik Labor AKEN

Injektion Time: 08:28:01  
 Injektion Date: 23.01.2015

| Instrument Conditions: | At Start | At Stop |
|------------------------|----------|---------|
| Temperature in °C:     | 30.0     | 30.0    |
| Pressure in bar:       | 46.0     | 45.9    |
| Flow in ml/min:        | 0.7      | 0.7     |

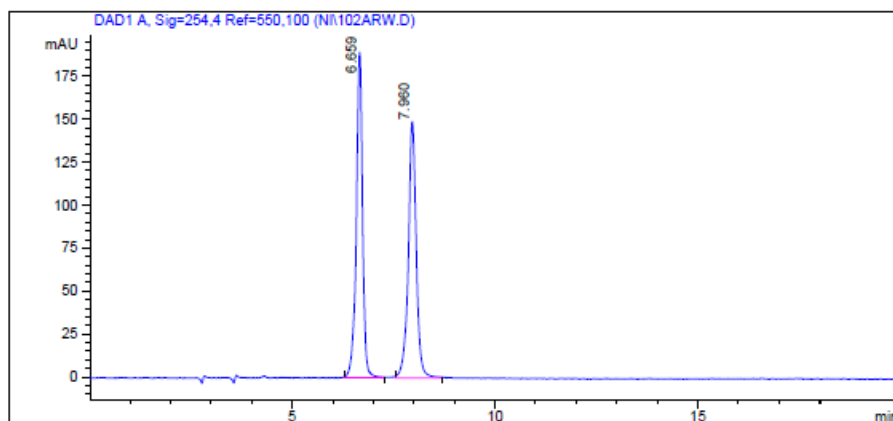

| #     | Ret. Time (min) | Width | Height (mAU) | Area (mAU*s) | Area % |
|-------|-----------------|-------|--------------|--------------|--------|
| 1     | 6.66            | 0.17  | 189.14       | 2037.55      | 50.09  |
| 2     | 7.96            | 0.22  | 148.08       | 2030.47      | 49.91  |
| Total |                 |       |              | 4068.02      | 100.00 |

## Enantioenriched 3j

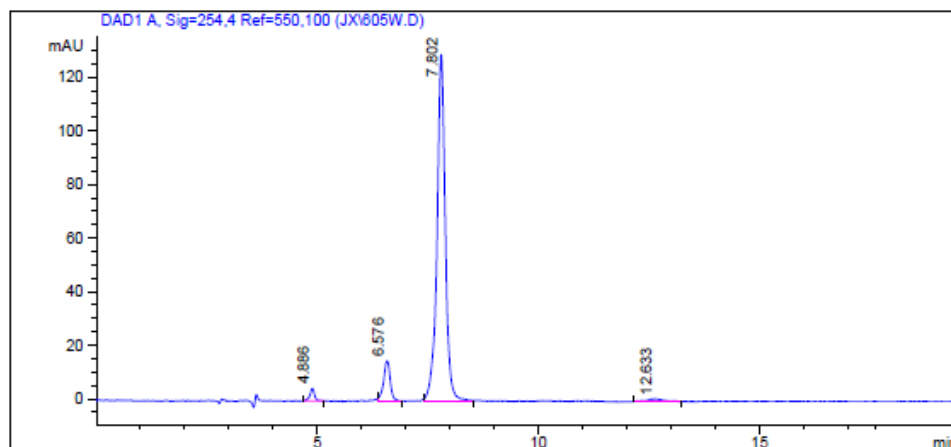

| #     | Ret. Time (min) | Width | Height (mAU) | Area (mAU*s) | Area % |
|-------|-----------------|-------|--------------|--------------|--------|
| 1     | 4.89            | 0.13  | 4.61         | 34.53        | 1.82   |
| 2     | 6.58            | 0.16  | 14.88        | 156.10       | 8.21   |
| 3     | 7.80            | 0.21  | 129.07       | 1689.22      | 88.85  |
| 4     | 12.63           | 0.34  | 0.93         | 21.34        | 1.12   |
| Total |                 |       |              | 1901.19      | 100.00 |

<sup>1</sup>H NMR of **3k**

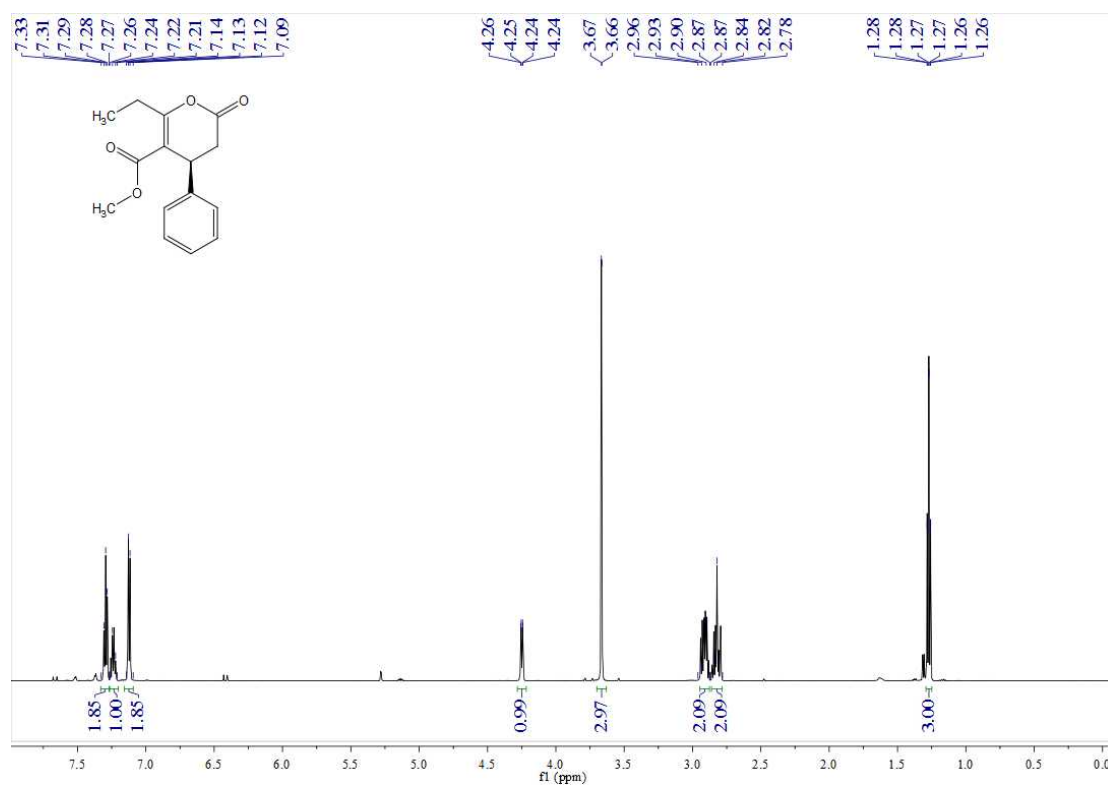

<sup>13</sup>C NMR of **3k**

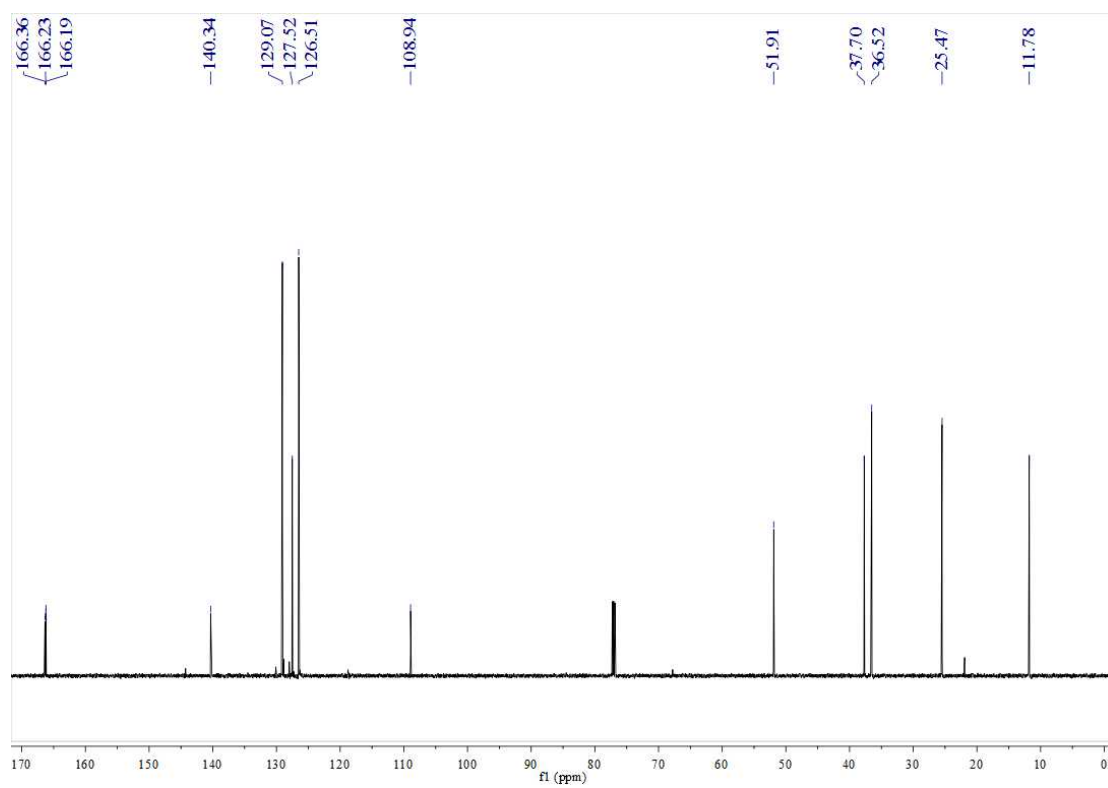

# HPLC analysis: rac-3k

Data file: D:\BERT\NI\97ARW.D  
 Sample Info: Laufmittel: n-Heptan/EtOH 9:1;  
 Die Probe ist in DCM/LM gelöst

Säule: WHELK.M  
 Säuleninfo: (s,s)-WHELK O1 (250x4,6)mm

Operator: Analytik Labor AKEN

Injektion Time: 09:59:55  
 Injektion Date: 14.01.2015

|                        |          |         |
|------------------------|----------|---------|
| Instrument Conditions: | At Start | At Stop |
| Temperature in °C:     | 30.0     | 30.0    |
| Pressure in bar:       | 52.0     | 52.0    |
| Flow in ml/min:        | 1.0      | 1.0     |

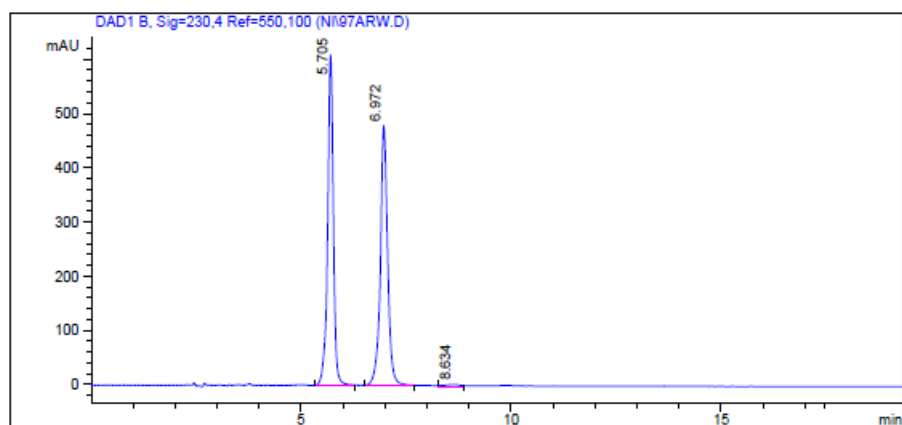

| #     | Ret. Time (min) | Width | Height (mAU) | Area (mAU*s) | Area % |
|-------|-----------------|-------|--------------|--------------|--------|
| 1     | 5.70            | 0.14  | 609.97       | 5753.59      | 49.57  |
| 2     | 6.97            | 0.18  | 478.98       | 5750.17      | 49.54  |
| 3     | 8.63            | 0.43  | 4.00         | 102.21       | 0.88   |
| Total |                 |       |              | 11605.97     | 100.00 |

## Enantioenriched 3k

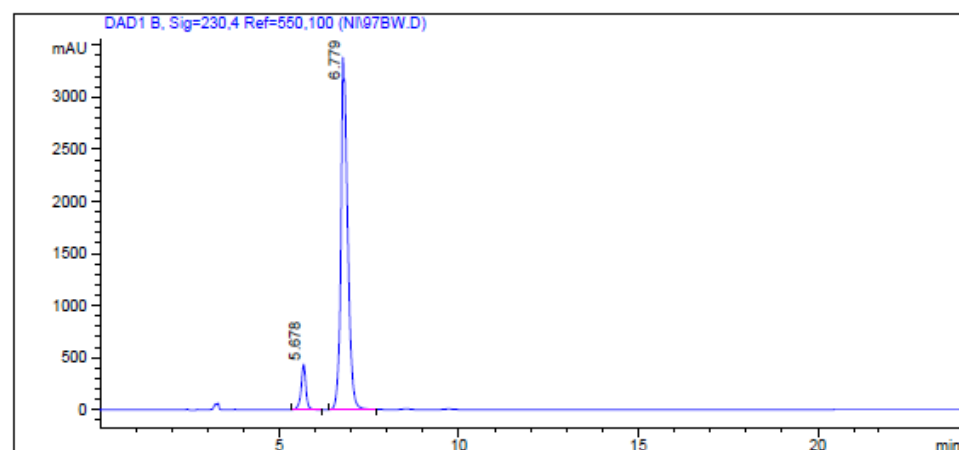

| #     | Ret. Time (min) | Width | Height (mAU) | Area (mAU*s) | Area % |
|-------|-----------------|-------|--------------|--------------|--------|
| 1     | 5.68            | 0.14  | 437.13       | 4070.50      | 8.40   |
| 2     | 6.78            | 0.17  | 3377.56      | 44406.45     | 91.60  |
| Total |                 |       |              | 48476.95     | 100.00 |

<sup>1</sup>H NMR of **31**

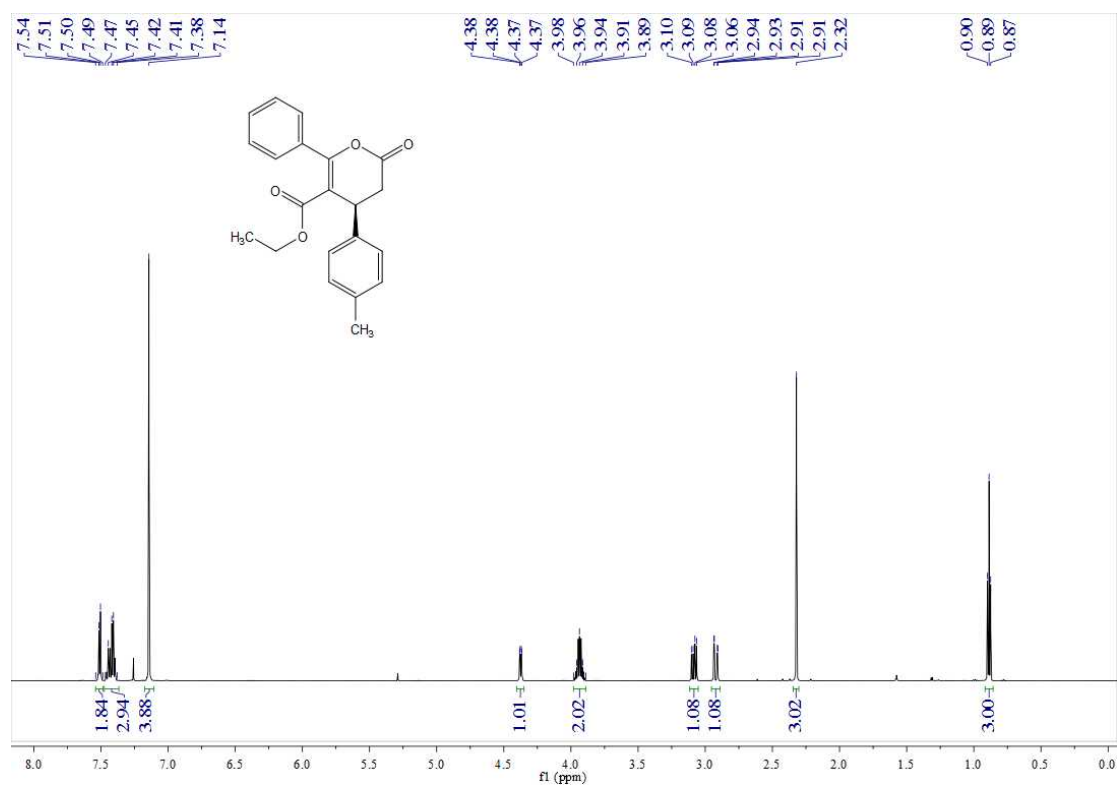

<sup>13</sup>C NMR of **31**

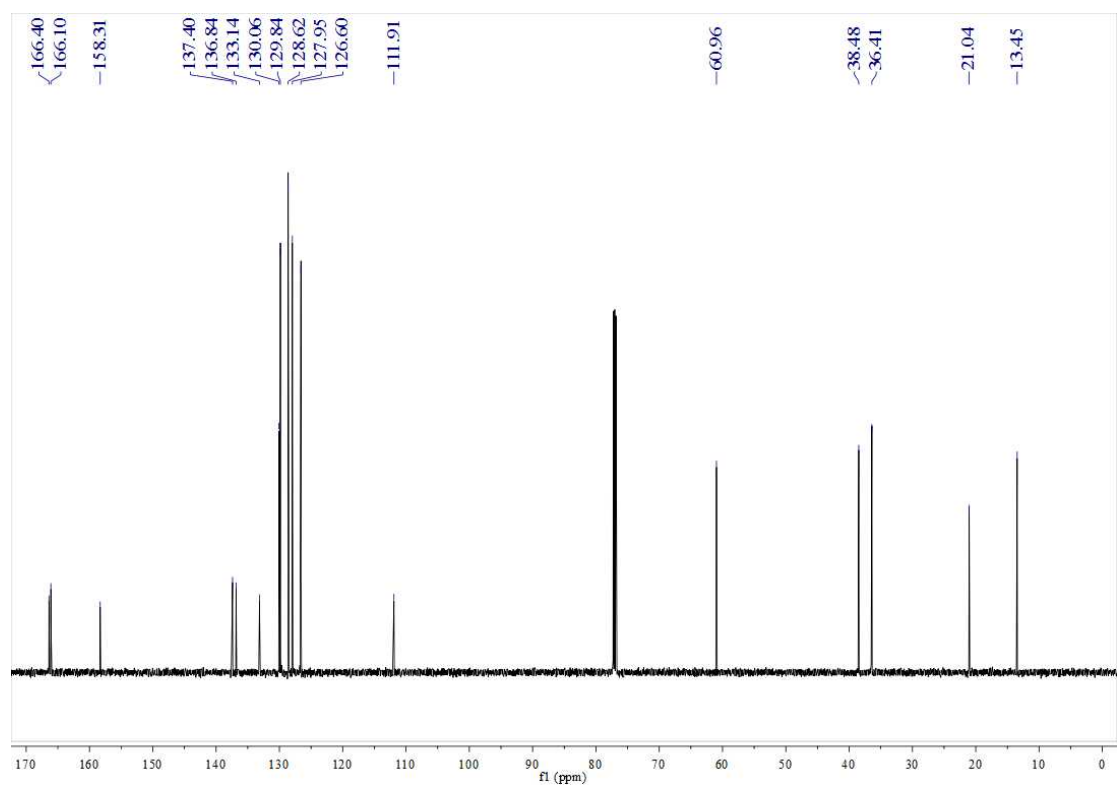



# HPLC analysis: rac-31

Data file: D:\GONZO\NI\110AR10D.D  
 Sample Info: Laufmittel: n-Heptan/iPrOH 9:1;  
 Die Probe ist in DCM/LM gelöst

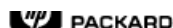

Säule: DAICELOD.M  
 Säuleninfo: Chiralcel OD (250x4,6)mm  
 Operator: Analytik Labor AKEN

Injektion Time: 11:45:28  
 Injektion Date: 03.02.2015

Instrument Conditions: At Start At Stop  
 Temperature in°C: 30.0°C 30.0°C  
 Pressure in bar: 25.1 24.8  
 Flow in ml/min: 0.70 0.70

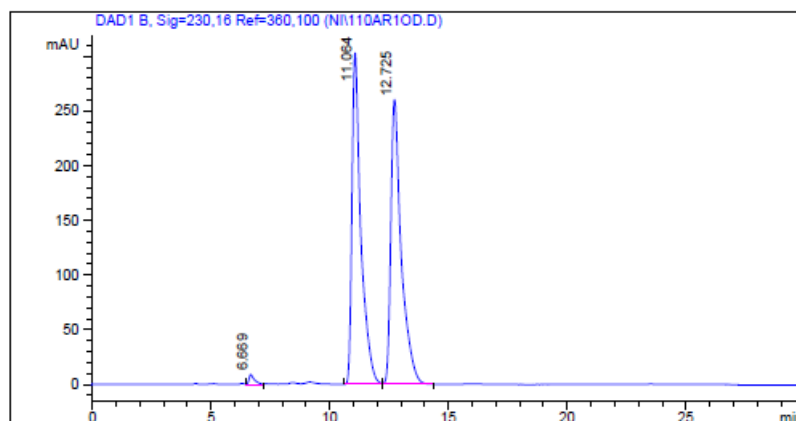

| #     | Ret. Time<br>(min) | Width | Height<br>(mAU) | Area<br>(mAU*s) | Area % |
|-------|--------------------|-------|-----------------|-----------------|--------|
| 1     | 6.67               | 0.23  | 9.07            | 145.59          | 0.91   |
| 2     | 11.06              | 0.38  | 303.10          | 7919.58         | 49.43  |
| 3     | 12.72              | 0.44  | 260.29          | 7956.14         | 49.66  |
| Total |                    |       |                 | 16021.30        | 100.00 |

## Enantioenriched 31

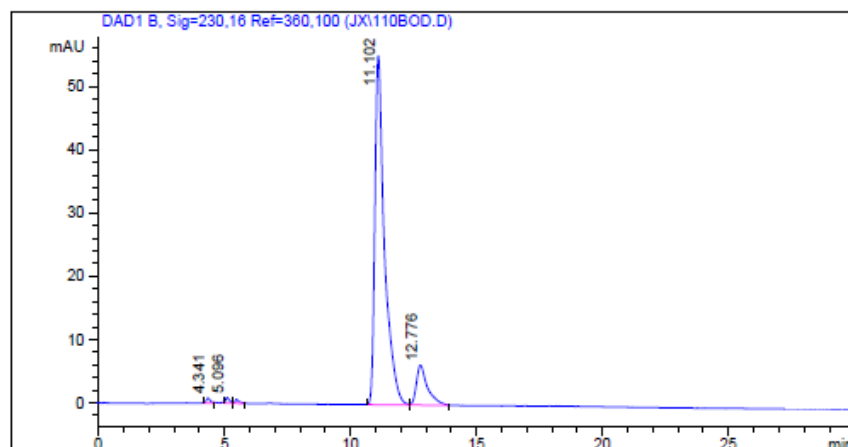

| #     | Ret. Time<br>(min) | Width | Height<br>(mAU) | Area<br>(mAU*s) | Area % |
|-------|--------------------|-------|-----------------|-----------------|--------|
| 1     | 4.34               | 0.17  | 0.80            | 8.87            | 0.53   |
| 2     | 5.10               | 0.16  | 0.92            | 10.23           | 0.61   |
| 3     | 5.47               | 0.17  | 0.63            | 7.49            | 0.44   |
| 4     | 11.10              | 0.39  | 55.16           | 1464.45         | 86.93  |
| 5     | 12.78              | 0.44  | 6.32            | 193.52          | 11.49  |
| Total |                    |       |                 | 1684.55         | 100.00 |

<sup>1</sup>H NMR of **3m**

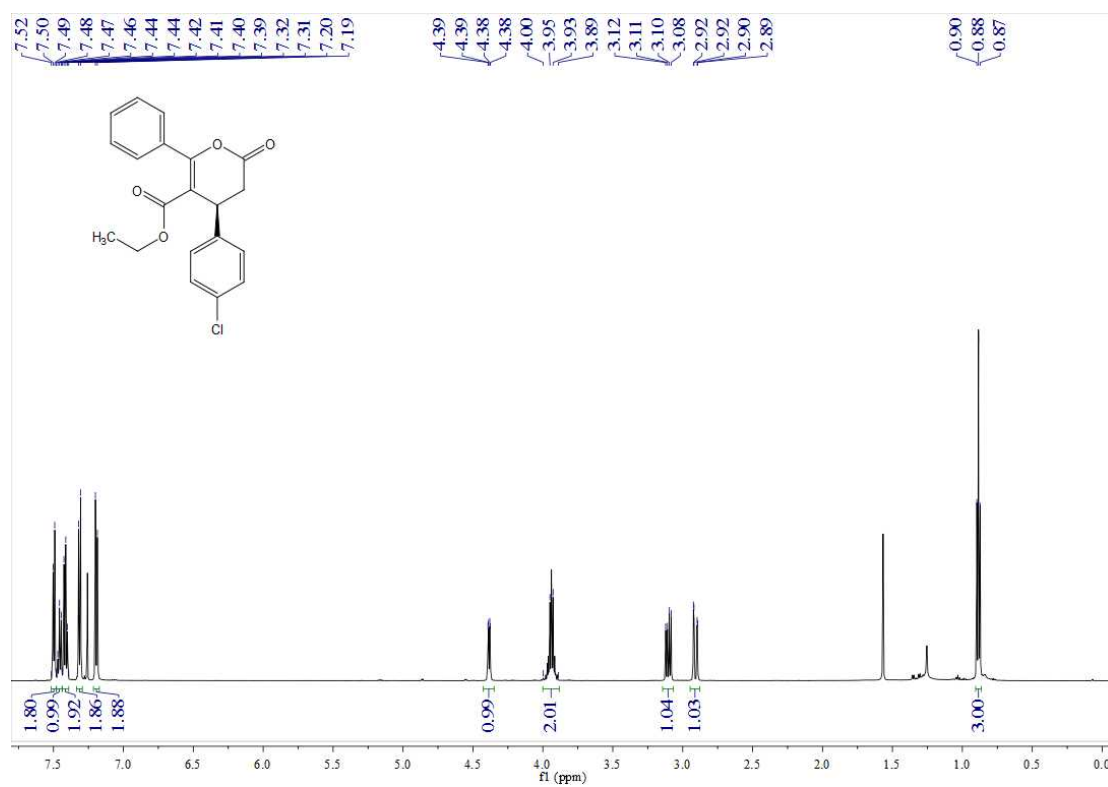

<sup>13</sup>C NMR of **3m**

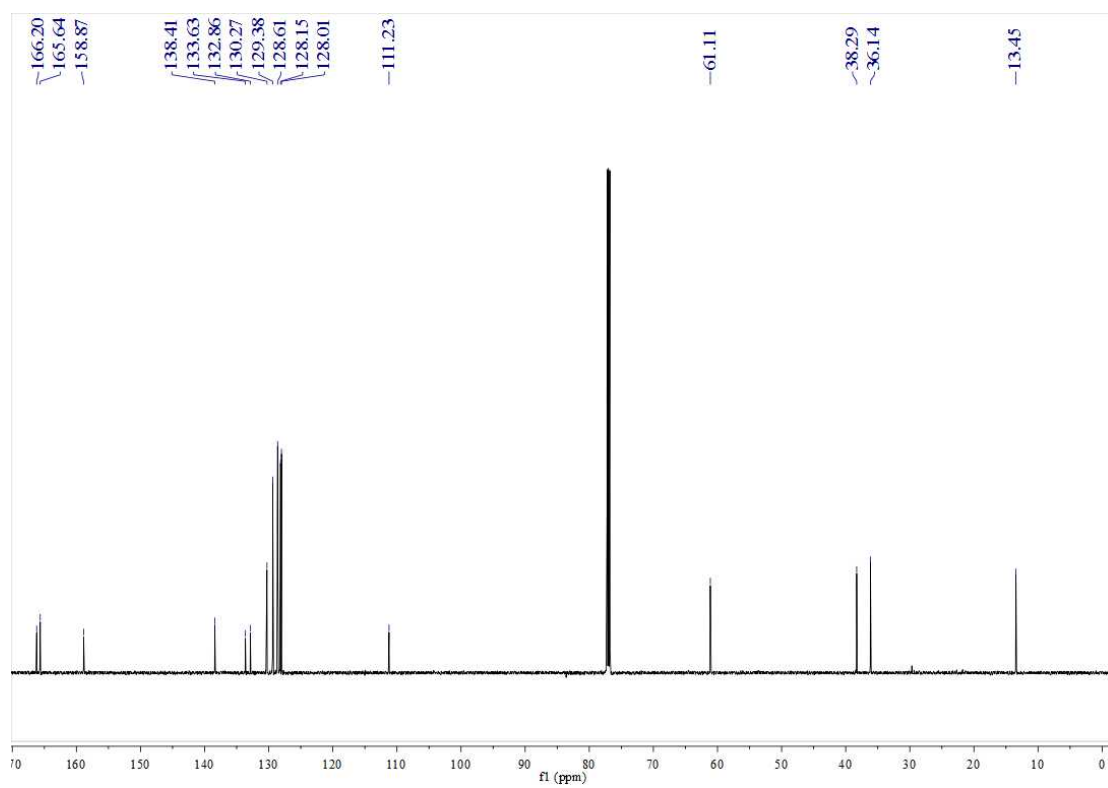

# HPLC analysis: rac-3m

Data file: D:\GONZO\NI\105ARAD.D  
 Sample Info: Laufmittel: n-Heptan/iPrOH 9:1;  
 Die Probe ist in DCM/LM gelöst.

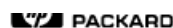

Säule: DAICELAD.M  
 Säuleninfo: Chiralpak AD (250x4,6)mm  
 Operator: Analytik Labor AKEN

Injektion Time: 07:50:49  
 Injektion Date: 27.01.2015

Instrument Conditions: At Start At Stop  
 Temperature in °C: 30.0°C 30.0°C  
 Pressure in bar: 32.6 33.1  
 Flow in ml/min: 1.00 1.00

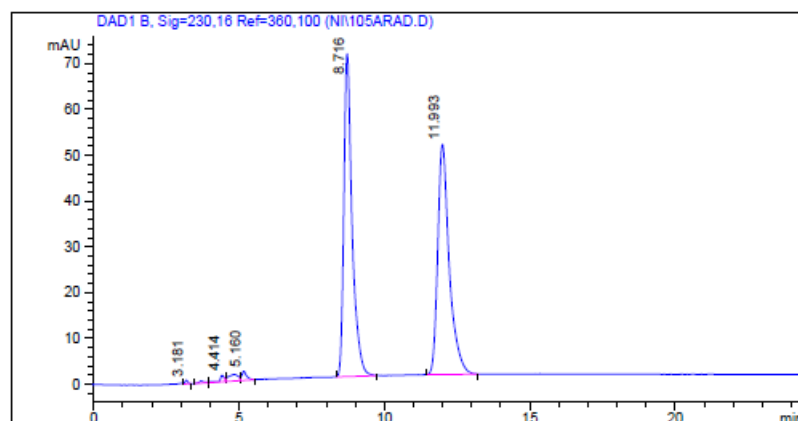

| #     | Ret. Time (min) | Width | Height (mAU) | Area (mAU*s) | Area % |
|-------|-----------------|-------|--------------|--------------|--------|
| 1     | 3.18            | 0.11  | 0.83         | 5.92         | 0.21   |
| 2     | 3.69            | 0.17  | 0.50         | 5.98         | 0.21   |
| 3     | 4.41            | 0.15  | 1.40         | 15.23        | 0.53   |
| 4     | 4.84            | 0.35  | 1.41         | 34.34        | 1.20   |
| 5     | 5.16            | 0.17  | 2.02         | 23.57        | 0.82   |
| 6     | 8.72            | 0.29  | 70.51        | 1387.88      | 48.55  |
| 7     | 11.99           | 0.41  | 50.24        | 1385.79      | 48.48  |
| Total |                 |       |              | 2858.71      | 100.00 |

## Enantioenriched 3m

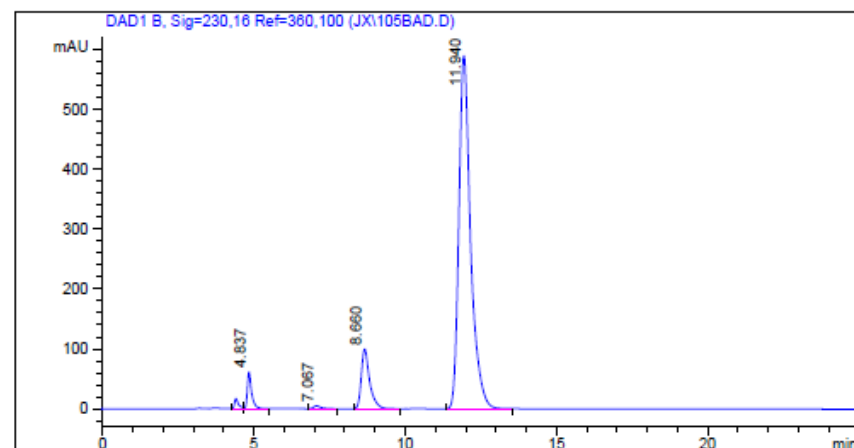

| #     | Ret. Time (min) | Width | Height (mAU) | Area (mAU*s) | Area % |
|-------|-----------------|-------|--------------|--------------|--------|
| 1     | 4.41            | 0.13  | 16.97        | 156.10       | 0.84   |
| 2     | 4.84            | 0.14  | 61.24        | 589.81       | 3.23   |
| 3     | 7.07            | 0.24  | 4.82         | 76.71        | 0.41   |
| 4     | 8.66            | 0.28  | 99.57        | 1903.06      | 10.25  |
| 5     | 11.94           | 0.40  | 589.74       | 15837.20     | 85.27  |
| Total |                 |       |              | 18572.88     | 100.00 |

<sup>1</sup>H NMR of **3n**

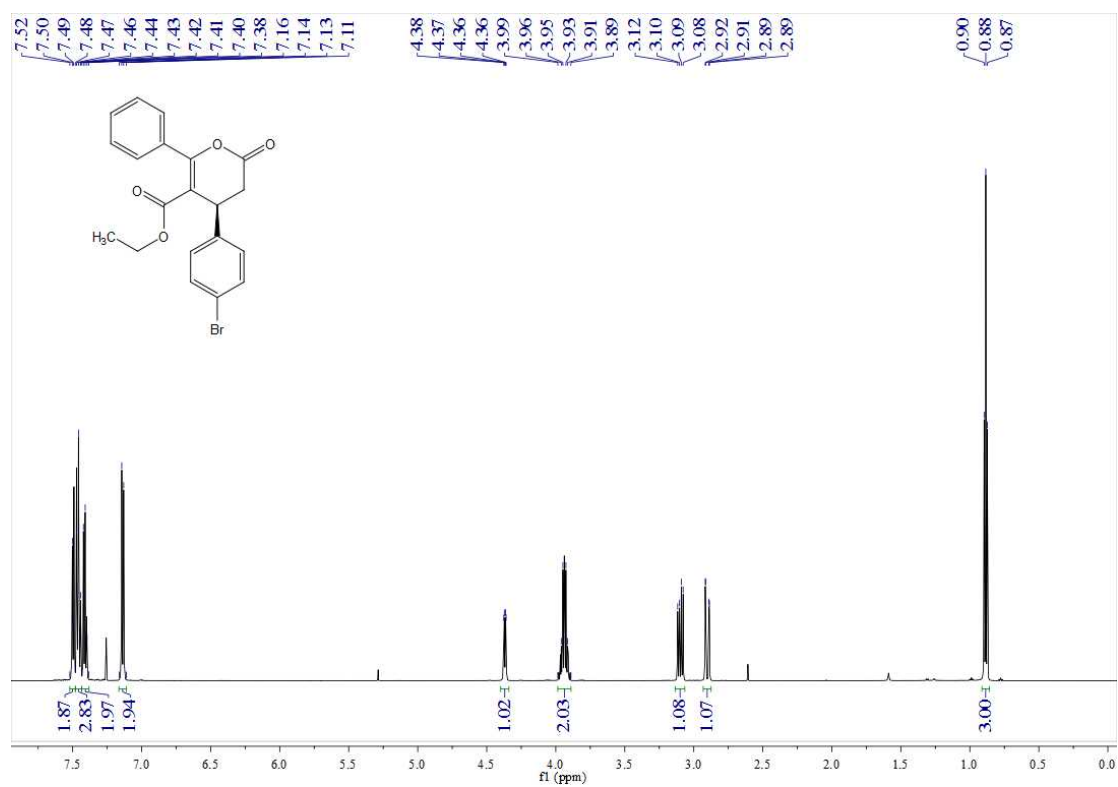

<sup>13</sup>C NMR of **3n**

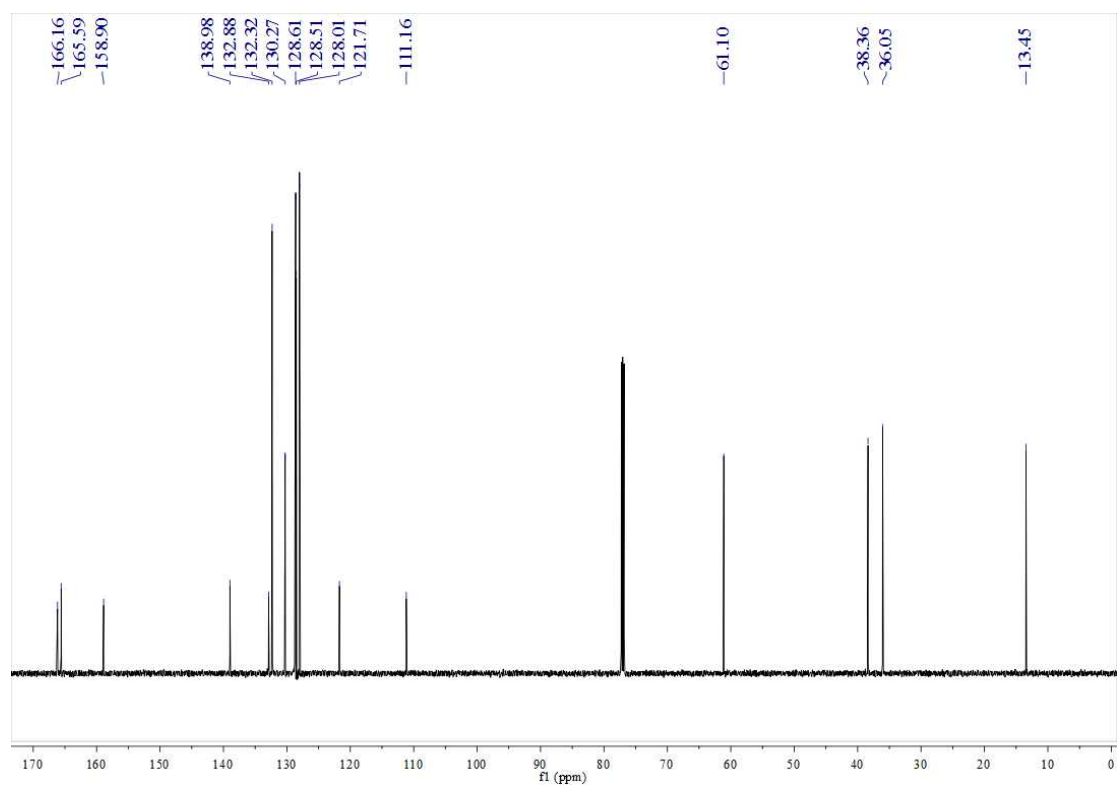

# HPLC analysis: rac-3n

Data file: D:\GONZO\NI\106ARAD.D  
 Sample Info: Laufmittel: n-Heptan/iPrOH 9:1;  
 Die Probe ist in DCM/LM gelöst.

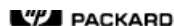

Säule: DAICELAD.M  
 Säuleninfo: Chiralpak AD (250x4,6)mm  
 Operator: Analytik Labor AKEN

Injektion Time: 08:19:00  
 Injektion Date: 27.01.2015

Instrument Conditions: At Start At Stop  
 Temperature in °C: 30.0°C 30.0°C  
 Pressure in bar: 32.4 32.8  
 Flow in ml/min: 1.00 1.00

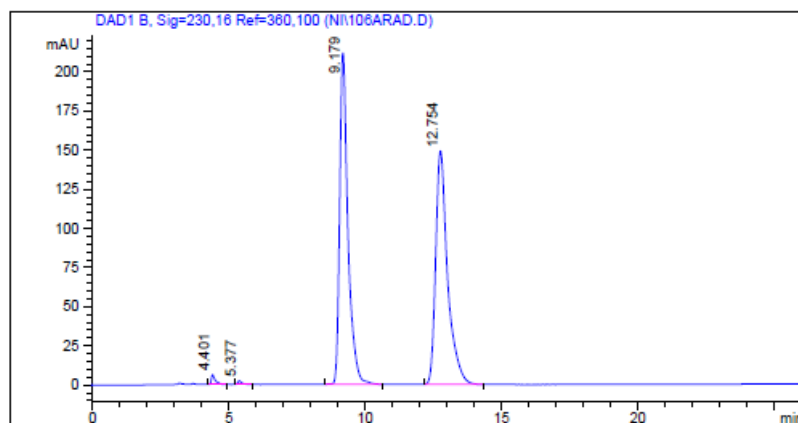

| #     | Ret. Time<br>(min) | Width | Height<br>(mAU) | Area<br>(mAU*s) | Area % |
|-------|--------------------|-------|-----------------|-----------------|--------|
| 1     | 4.40               | 0.15  | 6.37            | 68.80           | 0.76   |
| 2     | 5.38               | 0.17  | 2.38            | 27.90           | 0.31   |
| 3     | 9.18               | 0.31  | 211.80          | 4477.86         | 49.26  |
| 4     | 12.75              | 0.45  | 149.06          | 4515.36         | 49.67  |
| Total |                    |       |                 | 9089.92         | 100.00 |

## Enantioenriched 3n

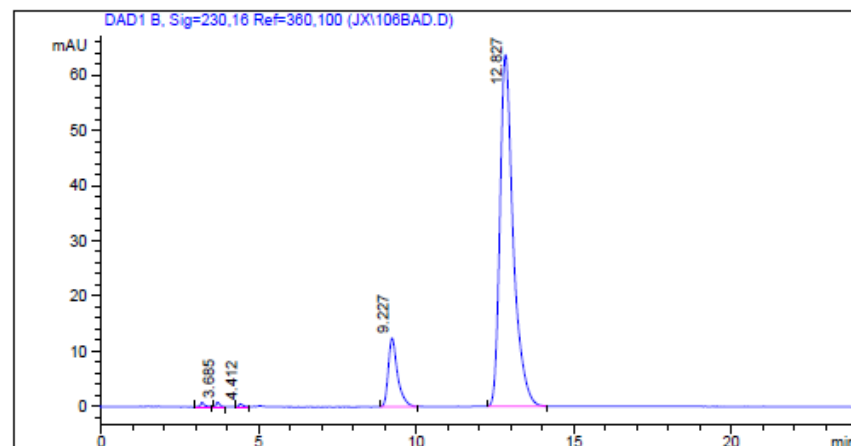

| #     | Ret. Time<br>(min) | Width | Height<br>(mAU) | Area<br>(mAU*s) | Area % |
|-------|--------------------|-------|-----------------|-----------------|--------|
| 1     | 3.19               | 0.13  | 0.63            | 7.24            | 0.34   |
| 2     | 3.68               | 0.11  | 0.65            | 6.34            | 0.30   |
| 3     | 4.41               | 0.14  | 0.53            | 5.10            | 0.24   |
| 4     | 9.23               | 0.30  | 12.44           | 255.68          | 11.95  |
| 5     | 12.83              | 0.44  | 63.69           | 1864.46         | 87.17  |
| Total |                    |       |                 | 2138.82         | 100.00 |

<sup>1</sup>H NMR of **3o**

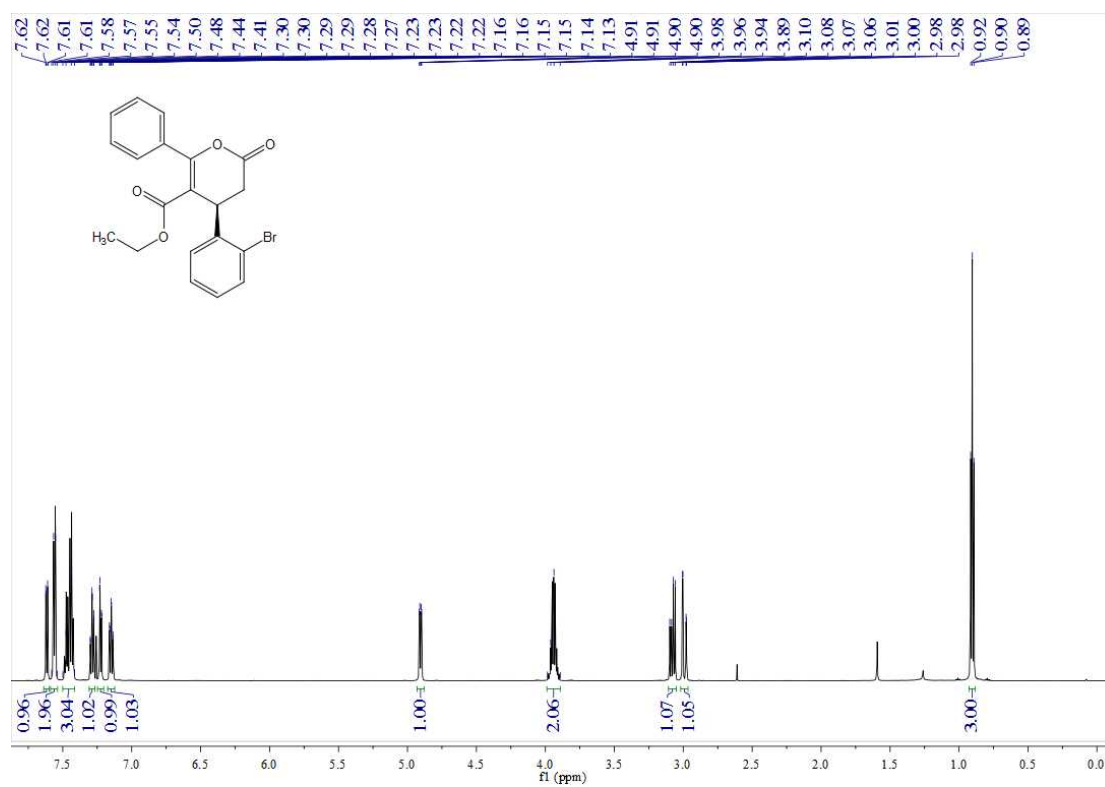

<sup>13</sup>C NMR of **3o**

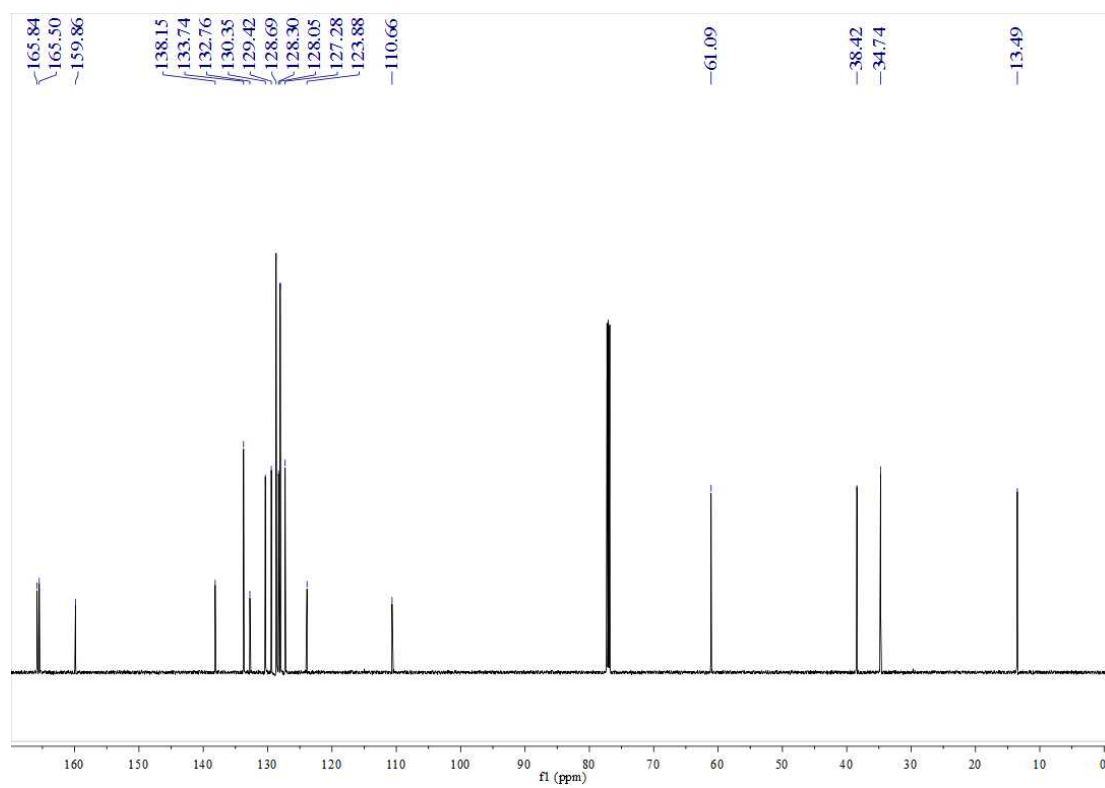

# HPLC analysis: rac-3o

Data file: D:\GONZO\NI\112AROD.D  
 Sample Info: Laufmittel: n-Heptan/iPrOH 9:1;  
 Die Probe ist in DCM/LM gelöst

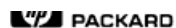

Säule: DAICELOD.M  
 Säuleninfo: Chiralcel OD (250x4,6)mm  
 Operator: Analytik Labor AKEN

Injektion Time: 17:24:19  
 Injektion Date: 02.02.2015

Instrument Conditions: At Start At Stop  
 Temperature in °C: 30.0°C 30.0°C  
 Pressure in bar: 35.5 35.8  
 Flow in ml/min: 1.00 1.00

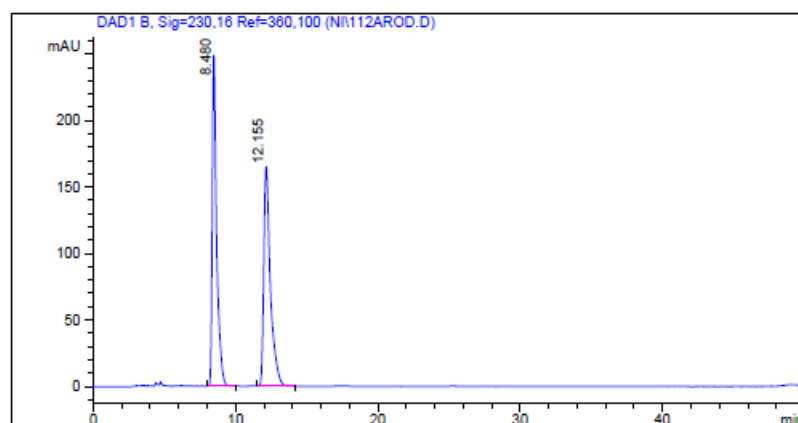

| #     | Ret. Time<br>(min) | Width | Height<br>(mAU) | Area<br>(mAU*s) | Area % |
|-------|--------------------|-------|-----------------|-----------------|--------|
| 1     | 8.48               | 0.32  | 247.92          | 5339.45         | 50.11  |
| 2     | 12.16              | 0.47  | 164.76          | 5316.61         | 49.89  |
| Total |                    |       |                 | 10656.06        | 100.00 |

## Enantioenriched 3o

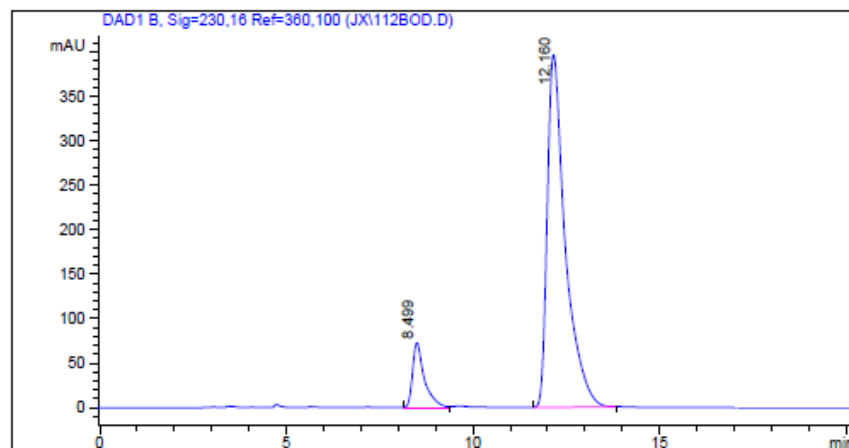

| #     | Ret. Time<br>(min) | Width | Height<br>(mAU) | Area<br>(mAU*s) | Area % |
|-------|--------------------|-------|-----------------|-----------------|--------|
| 1     | 8.50               | 0.32  | 72.56           | 1599.90         | 10.72  |
| 2     | 12.16              | 0.50  | 396.27          | 13318.11        | 89.28  |
| Total |                    |       |                 | 14918.01        | 100.00 |
